# Supplementary material for: SARS-CoV Genome Polymorphism: A Bioinformatics Study
Source: PubMed Central journal article supplement — Genomics Proteomics Bioinformatics. 2016 Nov 28;3(1):18–35. doi: 10.1016/S1672-0229(05)03004-4 (PMC5172477; doi:10.1016/s1672-0229(05)03004-4), 2016-11-28
Supplement: mmc1.pdf [file mmc1.pdf]

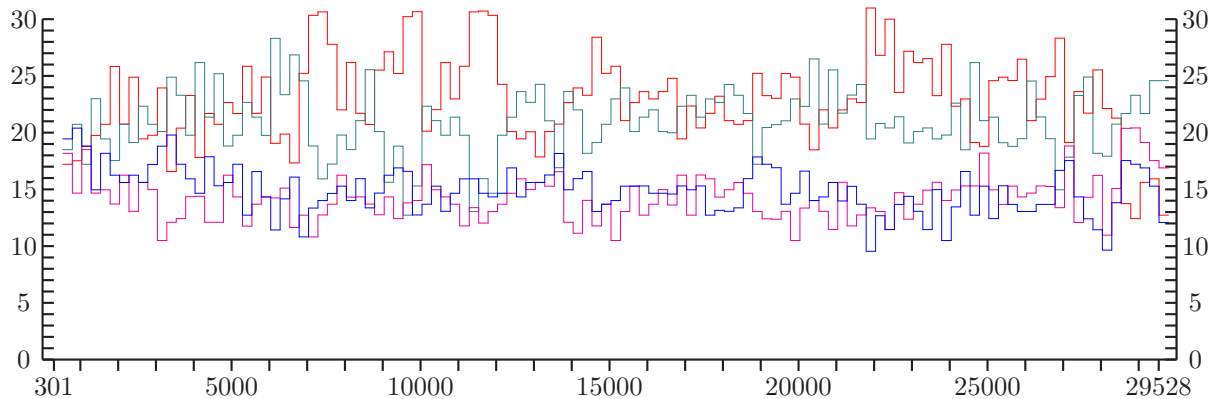

**Figure S1.** Percentage of nucleotides in 250-nt segments of the SARS-CoV genome

nucleotide G nucleotide T nucleotide C nucleotide A

Non-UTR regions of all the isolates are considered; positions (x-axis) are on the ClustalX output scale; percentage of nucleotides in the corresponding blocks are represented on y-axis

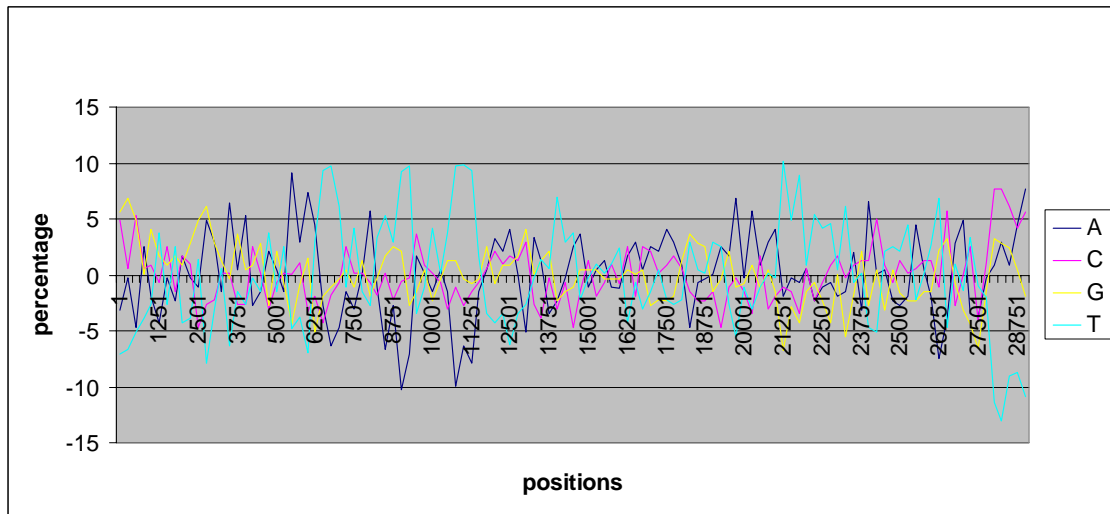

**Figure S2.** Deviation of percentages of nucleotides over 250-nt blocks from the corresponding percentages in the whole dataset

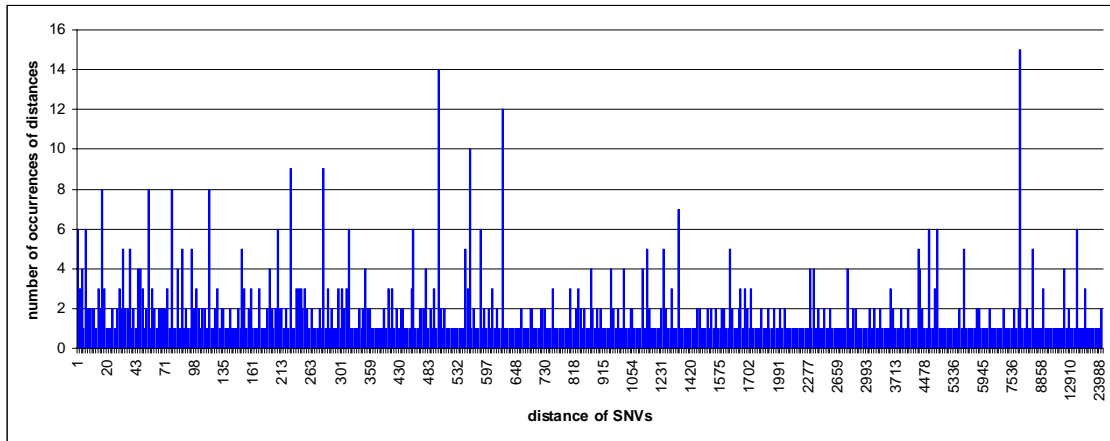

**Figure S3.** Distribution of distances between the neighboring SNVs, and numbers of their occurrences

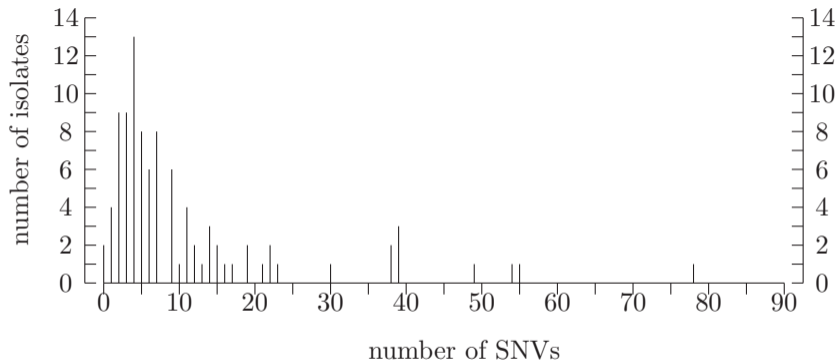

**Figure S4.** Distrubution of isolates per number of SNVs

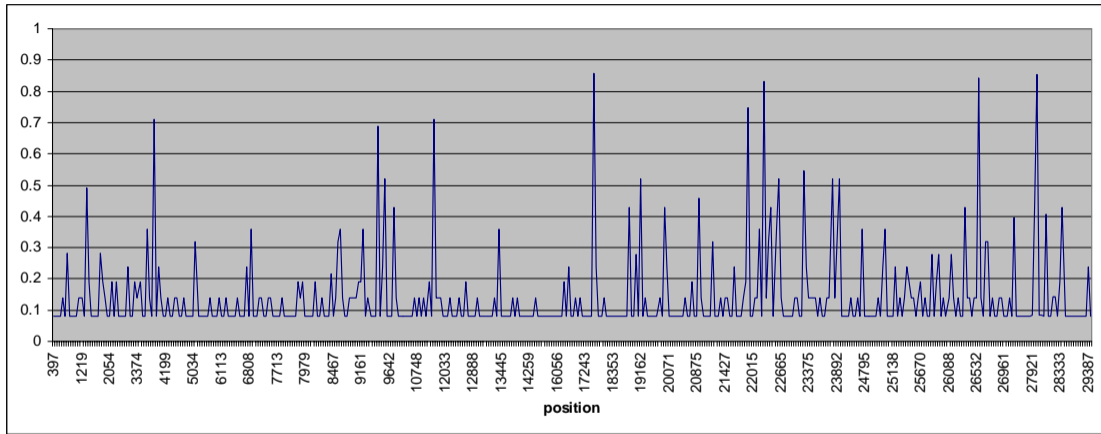

**Figure S5.** Entropy of genome nucleotide positions

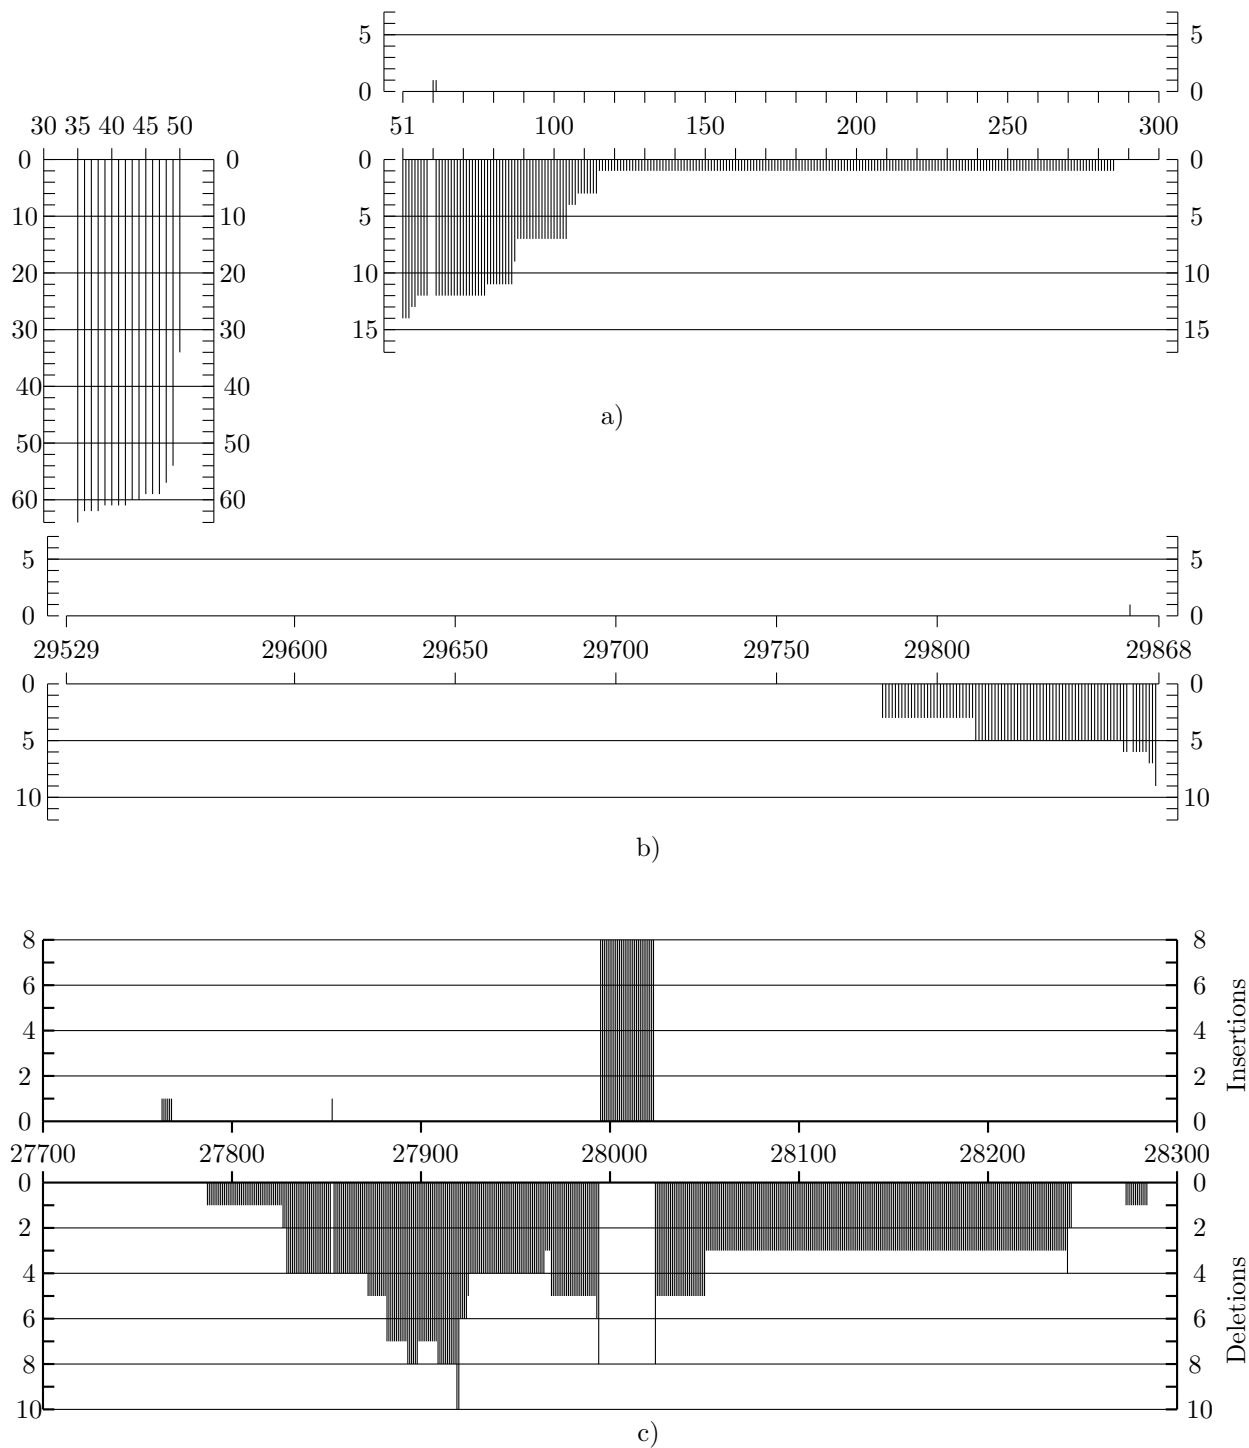

**Figure S6.** Distribution of INDELs in 5'UTR (a), 3'UTR (b) and in interval 27700-28300 (c)

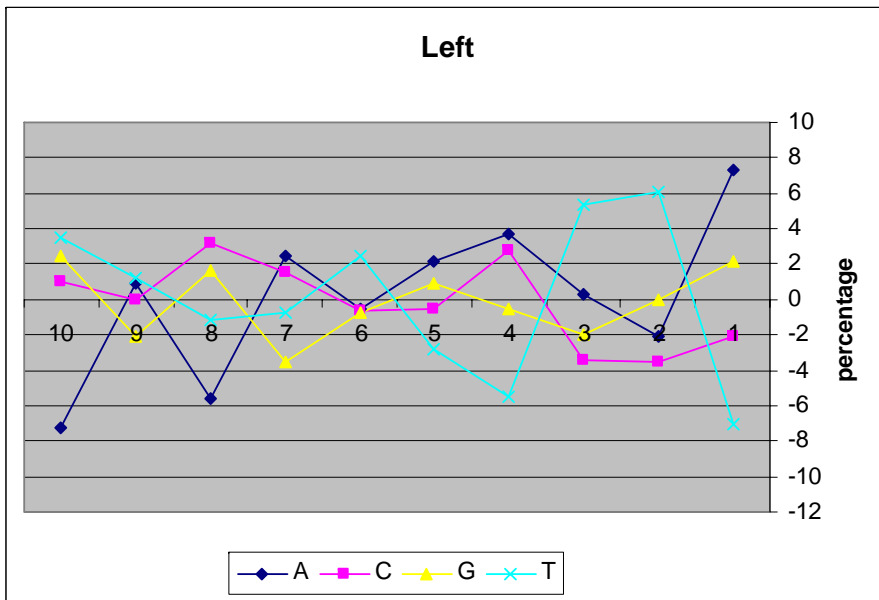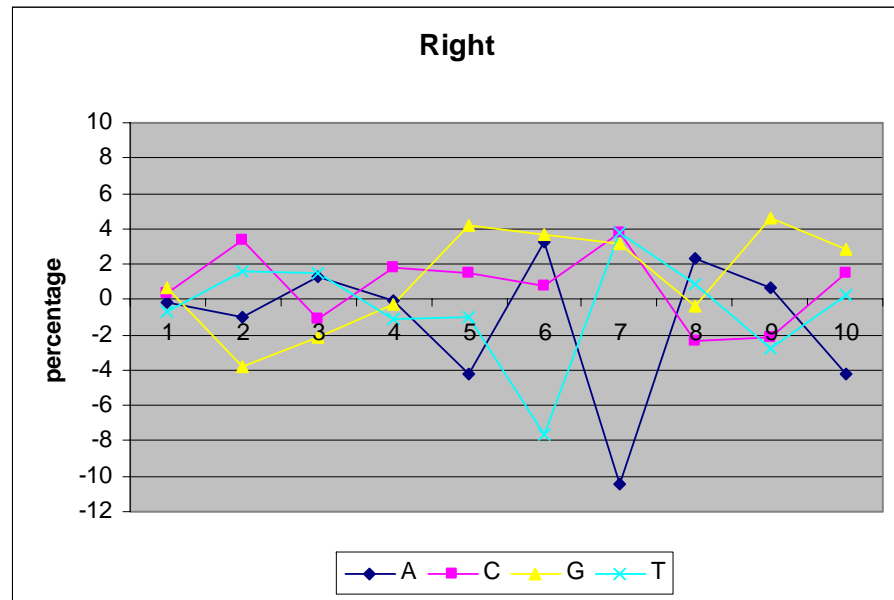

**Figure S7.** Differences between the percentage of nucleotides at a given position and in the whole genome, for up to the distance 10 left and right from SNV sites

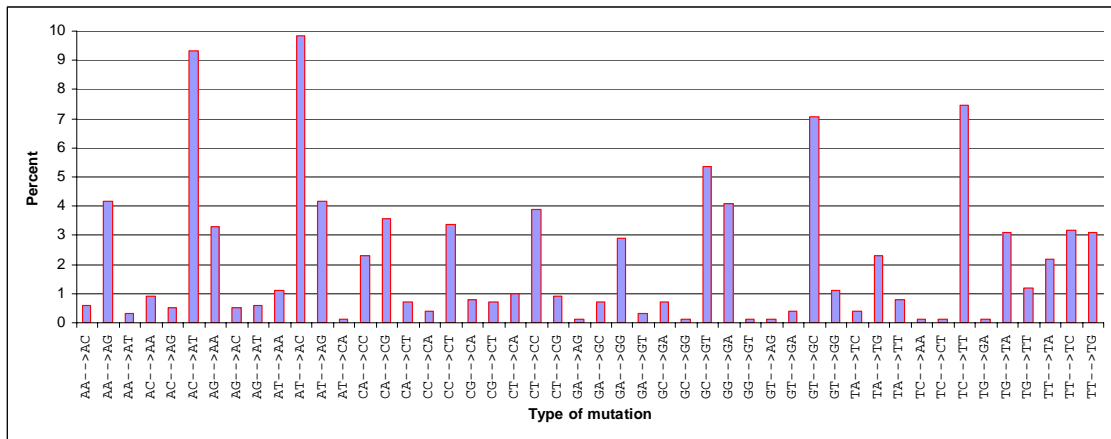

a)

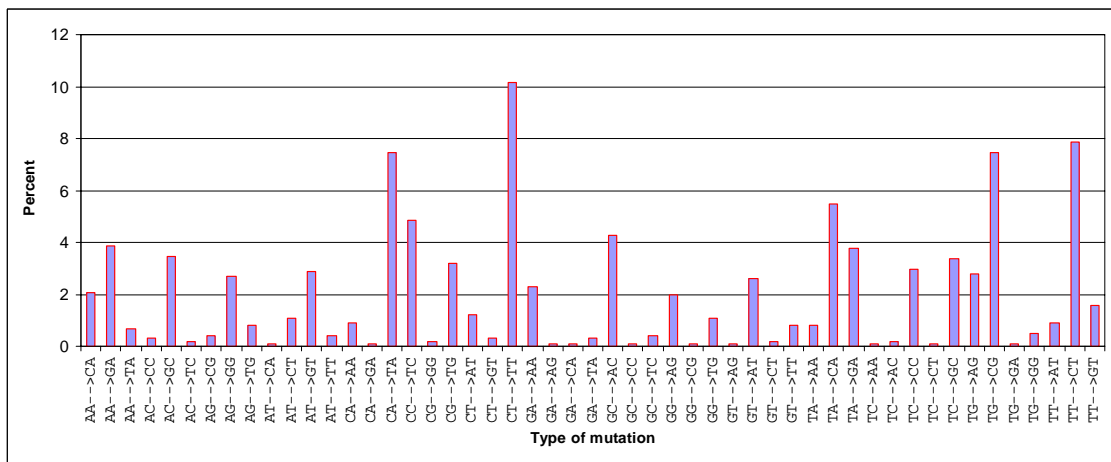

b)

**Figure S8.** Distribution of substitutions preceded by different nucleotide bases (a) and followed by different nucleotide bases (b)



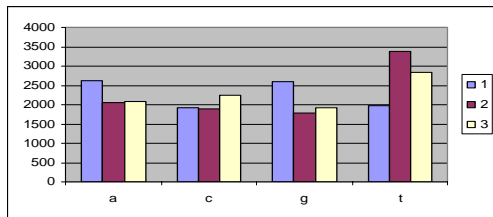

**Envelope protein**

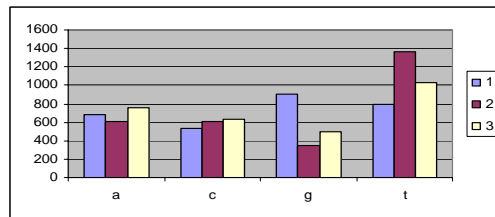

**Membrane protein**

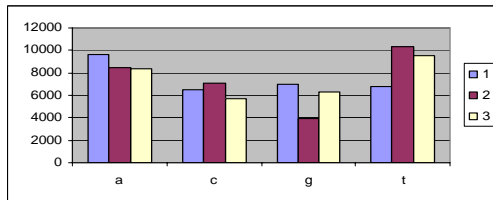

**Unknown (putative) orfs**

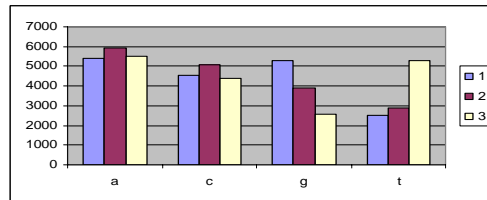

**Nucleocapsid protein**

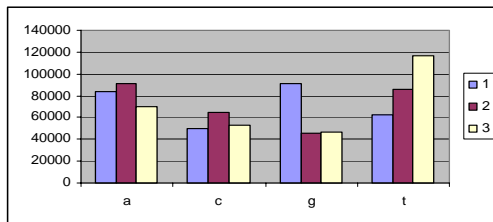

**orflab**

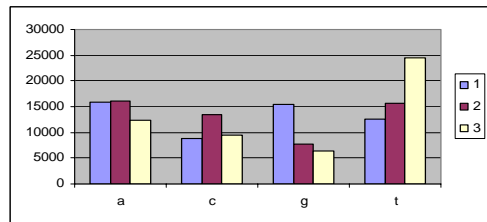

**Spike protein**

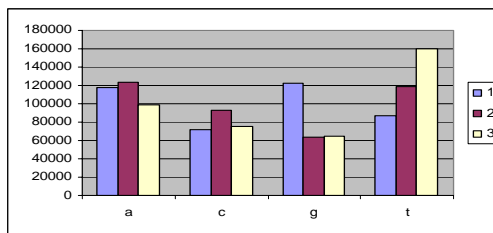

**Total in proteins**

**Figure S9.** Distribution of nucleotides over the three codon positions in specific proteins and in total

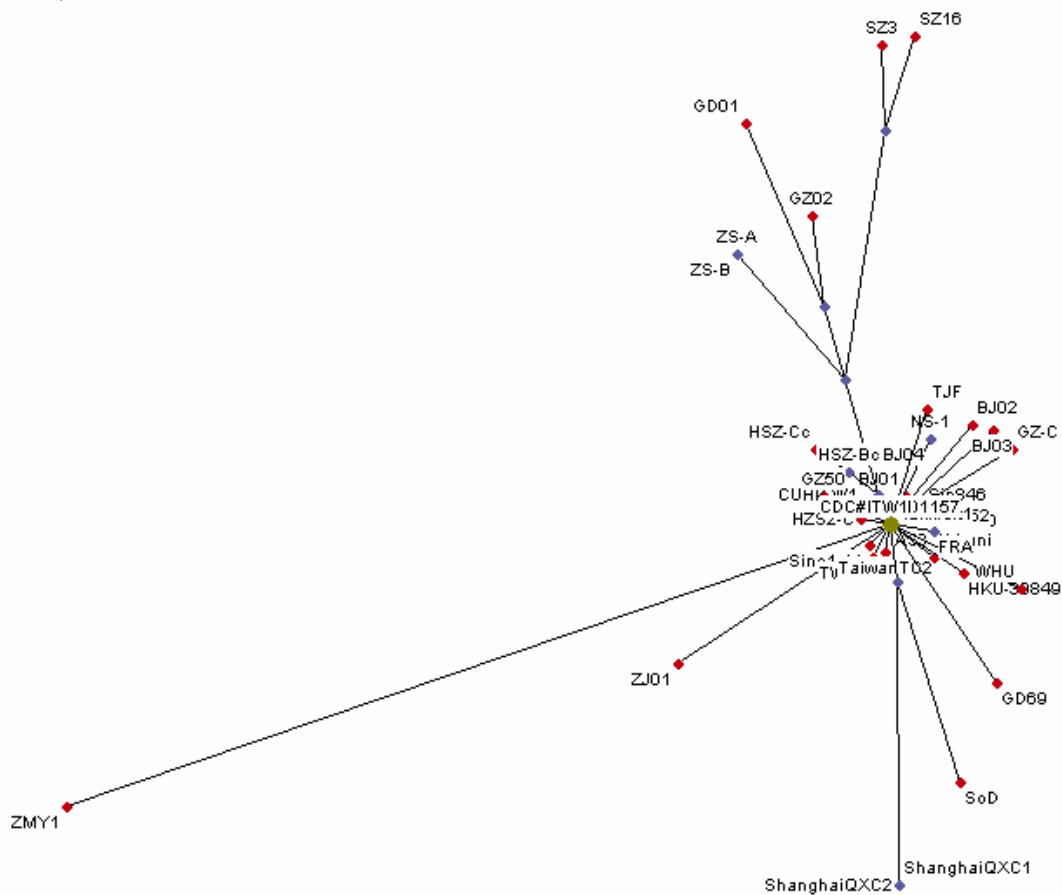

**Figure S10.** Root distances for isolates from the dataset

The isolates ZMY1, ZJ01, and the two Shanghai isolates have the largest root distance in the A group (the south side of the picture), and thus may not belong to it. (The isolates SoD and GD69 also have large root distances, but they have been moved into the A group on the basis of their SNV sites)

**Table S1. List of all the isolates considered.** It includes identifiers, accession numbers, revision dates, country and source of the isolates considered, labels to be referred to in this paper, as well as the length of isolates and the ambiguous nucleotide codes. The labels are assigned in the (approximate) order of the first submission of isolates

| Label | ID           | Accession No. | Length | Revision date | Country/Source                                      | GI       | FirstSubmitted                         | No. ambigBases |
|-------|--------------|---------------|--------|---------------|-----------------------------------------------------|----------|----------------------------------------|----------------|
| 1     | Tor2         | NC_004718.3   | 29751  | 30-SEP-2004   | Canada: Toronto, patient #2                         | 30271926 | 13-APR-2003                            |                |
| 2     |              | AY274119.3    |        | 24-MAR-2004   | Canada: Toronto, patient #2                         | 30248028 | 23-APR-2003                            |                |
| 3     | Urbani       | AY278741.1    | 29727  | 12-AUG-2003   | USA: Atlanta cell_line="Vero"                       | 30027617 | 17-APR-2003                            |                |
| 4     | CUHK-W1      | AY278554.2    | 29736  | 31-JUL-2003   | China: Hong Kong                                    | 30027610 | 17-APR-2003                            |                |
| 5     | BJ01         | AY278488.2    | 29725  | 01-MAY-2003   | China: Beijing                                      | 30275666 | 17-APR-2003                            |                |
| 6     | BJ02         | AY278487.3    | 29745  | 05-JUN-2003   | China: Beijing                                      | 31416292 | 17-APR-2003                            |                |
| 7     | BJ03         | AY278490.3    | 29740  | 05-JUN-2003   | China: Beijing                                      | 31416305 | 17-APR-2003                            |                |
| 8     | BJ04         | AY279354.2    | 29732  | 05-JUN-2003   | China: Beijing                                      | 31416306 | 19-APR-2003                            |                |
| 9     | NS-1         | AY508724.1    |        | 17-JAN-2004   |                                                     | 40795744 | 18-DEC-2003                            |                |
| 10    | GD01         | AY278489.2    | 29757  | 18-AUG-2003   | China: Beijing                                      | 31416290 | 17-APR-2003                            |                |
| 11    | HKU-39849    | AY278491.2    | 29742  | 29-AUG-2003   | China: Hong Kong                                    | 30023963 | 18-APR-2003                            |                |
| 12    | CUHK-Su10    | AY282752.2    | 29736  | 17-NOV-2003   | China: Hong Kong                                    | 30421451 | 24-APR-2003                            |                |
| 13    | Sin2500      | AY283794.1    | 29711  | 12-AUG-2003   | Singapore                                           | 30468042 | 27-APR-2003                            |                |
| 14    | Sin2679      | AY283796.1    | 29711  | 12-AUG-2003   | Singapore                                           | 30468044 | 27-APR-2003                            |                |
| 15    | Sin2774      | AY283798.2    | 29711  | 02-OCT-2003   | Singapore                                           | 37361915 | 27-APR-2003                            |                |
| 16    | Sin2677      | AY283795.1    | 29705  | 12-AUG-2003   | Singapore                                           | 30468043 | 27-APR-2003                            |                |
| 17    | Sin2748      | AY283797.1    | 29706  | 12-AUG-2003   | Singapore                                           | 30468045 | 27-APR-2003                            | N=1            |
| 18    | Frankfurt 1  | AY291315.1    | 29727  | 16-MAR-2004   | Germany: Frankfurt                                  | 31581502 | 06-MAY-2003                            |                |
| 19    | FRA          | AY310120.1    | 29740  | 12-DEC-2003   | Germany: patient from Frankfurt                     | 33578015 | 29-MAY-2003                            |                |
| 20    | ZJ01         | AY297028.1    | 29715  | 19-MAY-2003   | China: Beijing                                      | 30910859 | 12-MAY-2003                            | M=1            |
| 21    | SZ3          | AY304486.1    | 29741  | 05-NOV-2003   | China: Hong Kong                                    | 34482137 | 26-MAY-2003                            |                |
| 22    | SZ16         | AY304488.1    | 29731  | 05-NOV-2003   | China: Hong Kong                                    | 34482139 | 27-MAY-2003                            |                |
| 23    | GZ50         | AY304495.1    | 29720  | 05-NOV-2003   | China: Hong Kong                                    | 34482146 | 27-MAY-2003                            |                |
| 24    | GD69         | AY313906.1    | 29754  | 15-DEC-2003   | China: Jiangmen, Guangdong                          | 37960831 | 03-JUN-2003<br>isolated in<br>May 2003 |                |
| 25    | TWC          | AY321118.1    | 29725  | 26-JUN-2003   | Taiwan, first fatal case                            | 31873092 | 11-JUN-2003                            |                |
| 26    | HSR 1        | AY323977.2    | 29751  | 15-OCT-2003   | Italy                                               | 33115118 | 16-JUN-2003                            | R=1            |
| 27    | Taiwan TC1   | AY338174.1    | 29573  | 28-JUL-2003   | Taiwan                                              | 32493129 | 08-JUL-2003                            |                |
| 28    | Taiwan TC2   | AY338175.1    | 29573  | 28-JUL-2003   | Taiwan                                              | 32493130 | 09-JUL-2003                            |                |
| 29    | Taiwan TC3   | AY348314.1    | 29573  | 29-JUL-2003   | Taiwan                                              | 33188324 | 23-JUL-2003                            |                |
| 30    | CUHK-AG01    | AY345986.1    | 29736  | 29-NOV-2003   | Hong Kong: patient #1 of the<br>Amoy Gardens cohort | 33114190 | 18-JUL-2003                            |                |
| 31    | CUHK-AG02    | AY345987.1    |        | 29-NOV-2003   | patient #2 of the Amoy Gardens<br>cohort            | 33114202 | 18-JUL-2003                            |                |
| 32    | CUHK-AG03    | AY345988.1    | 29736  | 29-NOV-2003   | Hong Kong: patient #3 of the<br>Amoy Gardens cohort | 33114214 | 18-JUL-2003                            |                |
| 33    | PUMC01       | AY350750.1    | 29738  | 17-NOV-2003   | China: Beijing                                      | 38231927 | 24-JUL-2003                            |                |
| 34    | PUMC02       | AY357075.1    | 29738  | 17-NOV-2003   | China: Beijing                                      | 38231932 | 31-JUL-2003                            |                |
| 35    | PUMC03       | AY357076.1    | 29745  | 17-NOV-2003   | China: Beijing                                      | 38231937 | 31-JUL-2003                            |                |
| 36    | ZMY 1        | AY351680.1    | 29749  | 03-AUG-2003   | China: Guangdong                                    | 33304219 | 28-JUL-2003                            |                |
| 37    | TWH          | AP006557.1    | 29727  | 02-AUG-2003   | Taiwan: patient #01 – cultured                      | 33411399 | 30-JUL-2003                            |                |
| 38    | WC2          | AY362698.1    |        | 13-AUG-2003   | Taiwan: Hoping Hospital                             | 33518724 | 05-AUG-2003                            |                |
| 39    | TWK          | AP006559.1    | 29727  | 02-AUG-2003   | Taiwan: patient #06 - primary                       | 33411429 | 30-JUL-2003                            |                |
| 40    | TWS          | AP006560.1    | 29727  | 02-AUG-2003   | Taiwan: patient #04 - primary                       | 33411444 | 30-JUL-2003                            |                |
| 41    | TWY          | AP006561.1    | 29727  | 02-AUG-2003   | Taiwan: patient #02 - primary                       | 33411459 | 30-JUL-2003                            |                |
| 42    | TWC3         | AY362699.1    | 29727  | 13-AUG-2003   | Taiwan: Hoping Hospital –<br>throat swab            | 33518725 | 05-AUG-2003                            |                |
| 43    | TWJ          | AP006558.1    | 29725  | 02-AUG-2003   | Taiwan: patient #043<br>Primary                     | 33411414 | 30-JUL-2003                            |                |
| 44    | GZ02         | AY390556.1    | 29760  | 31-JAN-2004   | China: Guangzhou                                    | 41323719 | 15-SEP-2003                            |                |
| 45    | WHU          | AY394850.2    | 29728  | 07-JUN-2004   | China: Wuhan                                        | 40795428 | 18-SEP-2003                            |                |
| 46    | HZS2-D       | AY394989.1    | 29736  | 29-JAN-2004   | China: Guangzhou                                    | 37624332 | 19-SEP-2003                            |                |
| 47    | HZS2-E       | AY394990.1    | 29736  | 29-JAN-2004   | China: Guangzhou                                    | 37624333 | 19-SEP-2003                            |                |
| 48    | HZS2-Fc      | AY394991.1    | 29736  | 29-JAN-2004   | China: Guangzhou                                    | 37624334 | 19-SEP-2003                            |                |
| 49    | HZS2-C       | AY394992.1    | 29736  | 29-JAN-2004   | China: Guangzhou                                    | 37624335 | 19-SEP-2003                            |                |
| 50    | HGZ8L2       | AY394993.1    | 29736  | 29-JAN-2004   | China: Guangzhou                                    | 37624336 | 19-SEP-2003                            |                |
| 51    | LC1          | AY394998.1    | 29736  | 29-JAN-2004   | China: Guangzhou                                    | 37624341 | 19-SEP-2003                            |                |
| 52    | GZ-B         | AY394978.1    | 29640  | 29-JAN-2004   | China: Guangzhou                                    | 37624321 | 19-SEP-2003                            |                |
| 53    | GZ-C         | AY394979.1    | 29645  | 29-JAN-2004   | China: Guangzhou                                    | 37624322 | 19-SEP-2003                            |                |
| 54    | HSZ2-A       | AY394983.1    | 29699  | 29-JAN-2004   | China: Guangzhou                                    | 37624326 | 19-SEP-2003                            |                |
| 55    | HZS2-Fb      | AY394987.1    | 29709  | 29-JAN-2004   | China: Guangzhou                                    | 37624330 | 19-SEP-2003                            |                |
| 56    | HSZ-Bb       | AY394985.1    | 29530  | 29-JAN-2004   | China: Guangzhou                                    | 37624328 | 19-SEP-2003                            |                |
| 57    | HSZ-Cb       | AY394986.1    | 29729  | 29-JAN-2004   | China: Guangzhou                                    | 37624329 | 19-SEP-2003                            |                |
| 58    | HSZ-Bc       | AY394994.1    | 29765  | 29-JAN-2004   | China: Guangzhou                                    | 37624337 | 19-SEP-2003                            |                |
| 59    | HSZ-Cc       | AY394995.1    | 29765  | 29-JAN-2004   | China: Guangzhou                                    | 37624338 | 19-SEP-2003                            |                |
| 60    | ZS-B         | AY394996.1    | 29683  | 29-JAN-2004   | China: Guangzhou                                    | 37624339 | 19-SEP-2003                            |                |
| 61    | ZS-A         | AY394997.1    | 29683  | 29-JAN-2004   | China: Guangzhou                                    | 37624340 | 19-SEP-2003                            |                |
| 62    | ZS-C         | AY395003.1    | 29647  | 29-JAN-2004   | China: Guangzhou                                    | 37624346 | 19-SEP-2003                            |                |
| 63    | LC2          | AY394999.1    | 29350  | 29-JAN-2004   | China: Guangzhou                                    | 37624342 | 19-SEP-2003                            |                |
| 64    | LC3          | AY395000.1    | 29350  | 29-JAN-2004   | China: Guangzhou                                    | 37624343 | 19-SEP-2003                            |                |
| 65    | LC4          | AY395001.1    | 29350  | 29-JAN-2004   | China: Guangzhou                                    | 37624344 | 19-SEP-2003                            |                |
| 66    | LC5          | AY395002.1    | 29350  | 29-JAN-2004   | China: Guangzhou                                    | 37624345 | 19-SEP-2003                            |                |
| 67    | AS           | AY427439.1    | 29711  | 21-OCT-2003   | Italy: Milan                                        | 37576845 | 02-OCT-2003                            |                |
| 68    | SoD          | AY461660.1    | 29715  | 23-NOV-2003   | Russia                                              | 38385714 | 31-OCT-2003                            |                |
| 69    | ShanghaiQXC1 | AY463059.1    | 29592  | 05-JAN-2004   | Shanghai                                            | 40457433 | 11-NOV-2003                            | M=1, R=1, Y=1  |
| 70    | ShanghaiQXC2 | AY463060.1    | 29013  | 05-JAN-2004   | Shanghai                                            | 40457448 | 11-NOV-2003                            | R=1, Y=1       |
| 71    | Sino1-11     | AY485277.1    | 29741  | 30-NOV-2003   | China: Beijing                                      | 38505482 | 21-NOV-2003                            |                |
| 72    | Sino3-11     | AY485278.1    | 29740  | 30-NOV-2003   | China: Beijing                                      | 38505491 | 21-NOV-2003                            |                |
| 73    | TW1          | AY291451.1    | 29729  | 25-FEB-2004   | Taiwan                                              | 30698326 | 06-MAY-2003                            |                |
| 74    | TW2          | AY502925.1    |        | 25-FEB-2004   | Taiwan                                              | 40548897 | 15-DEC-2003                            |                |
| 75    | TW3          | AY502926.1    | 29729  | 25-FEB-2004   | Taiwan                                              | 40548909 | 15-DEC-2003                            | M=1, Y=1       |
| 76    | TW4          | AY502927.1    | 29729  | 25-FEB-2004   | Taiwan                                              | 40548921 | 15-DEC-2003                            | R=1, W=1       |
| 77    | TW5          | AY502928.1    | 29729  | 25-FEB-2004   | Taiwan                                              | 40548933 | 15-DEC-2003                            |                |
| 78    | TW6          | AY502929.1    | 29729  | 25-FEB-2004   | Taiwan                                              | 40548945 | 15-DEC-2003                            |                |
| 79    | TW7          | AY502930.1    | 29729  | 25-FEB-2004   | Taiwan                                              | 40548957 | 15-DEC-2003                            |                |
| 80    | TW8          | AY502931.1    | 29729  | 25-FEB-2004   | Taiwan                                              | 40548969 | 15-DEC-2003                            | M=1            |
| 81    | TW9          | AY502932.1    | 29729  | 25-FEB-2004   | Taiwan                                              | 40548981 | 15-DEC-2003                            | R=1            |
| 82    | TW10         | AY502923.1    | 29729  | 25-FEB-2004   | Taiwan                                              | 40548873 | 15-DEC-2003                            |                |

| Label | ID            | Accession No. | Length | Revision date | Country/Source                     | GI       | FirstSubmitted | No. ambigBases             |
|-------|---------------|---------------|--------|---------------|------------------------------------|----------|----------------|----------------------------|
| 83    | TW11          | AY502924.1    | 29727  | 25-FEB-2004   | Taiwan                             | 40548885 | 15-DEC-2003    | W=1, Y=2                   |
| 84    | Sin842        | AY559081.1    | 29716  | 24-SEP-2004   | Singapore                          | 45644994 | 24-FEB-2004    |                            |
| 85    | Sin852        | AY559082.1    | 29670  | 24-SEP-2004   | Singapore                          | 45644996 | 24-FEB-2004    |                            |
| 86    | Sin3765V      | AY559084.1    | 29722  | 24-SEP-2004   | Singapore                          | 45645000 | 24-FEB-2004    |                            |
| 87    | Sin848        | AY559085.1    | 29713  | 24-SEP-2004   | Singapore                          | 45645001 | 24-FEB-2004    |                            |
| 88    | Sin849        | AY559086.1    | 29661  | 24-SEP-2004   | Singapore                          | 45645003 | 24-FEB-2004    |                            |
| 89    | Sin846        | AY559094.1    | 29577  | 24-SEP-2004   | Singapore                          | 45645021 | 24-FEB-2004    |                            |
| 90    | Sin3725V      | AY559087.1    | 29716  | 24-SEP-2004   | Singapore                          | 45645004 | 24-FEB-2004    | Y=5                        |
| 91    | SinP1         | AY559088.1    | 29714  | 24-SEP-2004   | Singapore                          | 45645007 | 24-FEB-2004    | R=1                        |
| 92    | SinP3         | AY559090.1    | 29725  | 24-SEP-2004   | Singapore                          | 45645013 | 24-FEB-2004    | R=1                        |
| 93    | SinP5         | AY559092.1    | 29713  | 24-SEP-2004   | Singapore                          | 45645017 | 24-FEB-2004    | R=1                        |
| 94    | SinP4,        | AY559091.1    | 29710  | 24-SEP-2004   | Singapore                          | 45645016 | 24-FEB-2004    | R=1                        |
| 95    | Sin845        | AY559093.1    | 29712  | 24-SEP-2004   | Singapore                          | 45645019 | 24-FEB-2004    |                            |
| 96    | Sin847        | AY559095.1    | 29719  | 24-SEP-2004   | Singapore                          | 45645022 | 24-FEB-2004    |                            |
| 97    | Sin850        | AY559096.1    | 29720  | 24-SEP-2004   | Singapore                          | 45645023 | 24-FEB-2004    |                            |
| 98    | LLJ-2004      | AY595412.1    | 29716  | 29-JUN-2004   | "aerosol sample"<br>China: Beijing | 49176846 | 08-APR-2004    | K=3, M=1, R=5,<br>S=1, W=1 |
| 99    | TJF           | AY654624.1    | 29745  | 24-JUL-2004   | China                              | 50365700 | 16-JUN-2004    |                            |
| 100   | CDC#200301157 | AY714217.1    | 29727  | 28-SEP-2004   | USA                                | 52546959 | 10-AUG-2004    |                            |
| 101   | Sin3408       | AY559083.1    | 29767  | 24-SEP-2004   | Singapore                          | 45644998 | 24-FEB-2004    | N=263, Y=1                 |
| 102   | SinP2         | AY559089.1    | 29717  | 24-SEP-2004   | Singapore                          | 45645010 | 24-FEB-2004    | N=30, R=1, S=1             |
| 103   | Sin3408L      | AY559097.1    | 29715  | 24-SEP-2004   | Singapore                          | 45645024 | 24-FEB-2004    | N=105, W=3, Y=1            |

**Table S2. SARS-CoV genome polymorphism (extended table).** All the 103 isolates are represented. Shaded entries correspond to annotated isolates. Last three isolates contain large number of ambiguous nucleotide codes (N).

**IDENTIFICATION** of isolates is given in accordance to the Labels, IDs and Accession numbers from the table S1. The four **SNVs** columns correspond to the total number of SNVs, number of SNVs in genes, number of SNVs in 5' and 3' UTRs, and the number of SNVs in intergenic regions (IGR). The eight columns named **INDELs** include number of deletions at the 5' end (at **first 15** genome positions, where most of the isolates are empty, and at the **following 5'UTR** positions, where most of the isolates are non-empty); the length and position of long insertions and long deletions (**longIns**, **longDel**), both absolute for the isolate in question and relative to the CLUSTAL output; number and length of short insertions and short deletions (**shortIns**, **shortDel**) in the form *axb* where *b* denotes the length and *a* the number of occurrences, along with their absolute and relative positions; number of deletions at the 3' end (**3'del**) and the length of a poly-a sequence at the 3' end (**3'poly-a**). **CLASSIFICATION** includes two columns. The **Type** column corresponds to the nine loci nucleotides that are given in the form NNNN/NNNNN and represent nucleotides at (relative to CLUSTAL output) positions 9420, 17604, 222274, 27891 and 3861, 9495, 11514, 21773, 26534, respectively (absolute Tor2 positions 9404, 17564, 22222, 27827 / 3852, 9479, 11493, 21721, 26477). The last column, **Group**, reflects the proposed grouping of isolates.

| IDENTIFICATION |             |               | SNVs  |        |           |      | INDELs           |                 |                    |                                                                                           |                                     |                     |       |            | CLASSIFICATION |       |
|----------------|-------------|---------------|-------|--------|-----------|------|------------------|-----------------|--------------------|-------------------------------------------------------------------------------------------|-------------------------------------|---------------------|-------|------------|----------------|-------|
| Label          | ID          | Accession No. | Total | Gene s | 5'/3' UTR | IG R | 5' Del -first 15 | 5' Del -follow. | longIns            | longDel                                                                                   | shortIns                            | shortDel            | 3'del | 3'poly-a   | Type           | Group |
| 1,2            | Tor2        | Nc_004718.3   | 2     | 2      | -/-       | -    | -                | -               | -                  | -                                                                                         | -                                   | -                   | -     | 24         | tttt/ttcgt     | A1    |
| 3              | Urbani      | Ay278741.1    | 5     | 5      | -/-       | -    | -                | -               | -                  | -                                                                                         | -                                   | -                   | -     | -          | tttt/ttcgt     | A1    |
| 4              | CUHK-W1     | Ay278554.2    | 9     | 8      | -/-       | 1    | 15               | -               | -                  | -                                                                                         | -                                   | -                   | -     | 24         | cgcc/tccat     | B1    |
| 5              | BJ01        | Ay278488.2    | 12    | 11     | -/-       | 1    | 15               | 4               | -                  | -                                                                                         | -                                   | -                   | -     | 17         | cgcc/tccat     | B1    |
| 6              | BJ02        | Ay278487.3    | 22    | 22     | -/-       | -    | -                | -               | -                  | -                                                                                         | -                                   | -                   | -     | 18         | cgcc/tccat     | B1    |
| 7              | BJ03        | Ay278490.3    | 22    | 22     | -/-       | -    | 4                | -               | -                  | -                                                                                         | -                                   | -                   | -     | 17         | cgcc/tccat     | B1    |
| 8,9            | NS-1(BJ04)  | AY508724.1    | 15    | 14     | -/-       | 1    | 15               | 1               | -                  | -                                                                                         | -                                   | -                   | -     | 21         | tgcc/ttcgt     | B1    |
| 10             | GD01        | Ay278489.2    | 49    | 49     | -/-       | -    | 15               | 1               | 29 (27868/27995)   | -                                                                                         | -                                   | -                   | -     | 17         | cgcc/tccat     | B2    |
| 11             | HKU-39849   | Ay278491.2    | 9     | 9      | -/-       | -    | -                | -               | -                  | -                                                                                         | -                                   | -                   | -     | 15         | tttt/ttcgt     | A1    |
| 12             | CUHK-Su10   | Ay282752.2    | 2     | 1      | -/-       | 1    | 15               | -               | -                  | -                                                                                         | -                                   | -                   | -     | 24         | tttt/ttcgg     | A1    |
| 13             | Sin2500     | Ay283794.1    | 2     | 2      | -/-       | -    | 15               | 1               | -                  | -                                                                                         | -                                   | -                   | -     | -          | tttt/ttcgt     | A1    |
| 14             | Sin2679     | Ay283796.1    | 2     | 2      | -/-       | -    | 15               | 1               | -                  | -                                                                                         | -                                   | -                   | -     | -          | tttt/ttcgt     | A1    |
| 15             | Sin2774     | Ay283798.2    | 4     | 4      | -/-       | -    | 15               | 1               | -                  | -                                                                                         | -                                   | -                   | -     | -          | tttt/ttcgt     | A1    |
| 16             | Sin2677     | Ay283795.1    | 3     | 3      | -/-       | -    | 15               | 1               | -                  | -                                                                                         | -                                   | 1x6 (27766 / 27893) | -     | -          | tttt/ttcgt     | A1    |
| 17             | Sin2748     | Ay283797.1    | 1     | 1      | -/-       | -    | 15               | 1               | -                  | -                                                                                         | -                                   | 1x5 (27794 / 27921) | -     | -          | tttt/ttcgt     | A1    |
| 18             | Frankfurt 1 | Ay291315.1    | 7     | 7      | -/-       | -    | -                | -               | -                  | -                                                                                         | -                                   | -                   | -     | -          | tttt/ttcgt     | A1    |
| 19             | FRA         | Ay310120.1    | 7     | 7      | -/-       | -    | -                | -               | -                  | -                                                                                         | -                                   | -                   | -     | 13         | tttt/ttcgt     | A1    |
| 20             | ZJ01        | Ay297028.1    | 23    | 23     | -/-       | -    | 14               | -               | -                  | 7x1 (8548,12975,13374,13450,13462,15558,27734 / 8612,13051,13451,13527,13539,15644,27853) | 2x1 (15526, 28465 / 15611, 28613 /) | 3                   | -     | tttt/ttcgt | B4             |       |
| 21             | SZ3         | Ay304486.1    | 54    | 53     | -/1       | -    | 15               | -               | 29 (27869 / 27995) | -                                                                                         | -                                   | -                   | -     | -          | cgcc/tccat     | B2    |
| 22             | SZ16        | Ay304488.1    | 55    | 55     | -/-       | -    | 15               | -               | 29 (27869 / 27995) | -                                                                                         | -                                   | -                   | 10    | -          | cgcc/tccat     | B2    |
| 23             | GZ50        | Ay304495.1    | 11    | 10     | -/1       | -    | 15               | -               | -                  | -                                                                                         | -                                   | -                   | -     | 8          | tgcc/tccat     | B1    |
| 24             | GD69        | Ay313906.1    | 21    | 21     | -/-       | -    | -                | -               | -                  | 1x1 (14295 / 14370),<br>1x10 (20374/20456)                                                | -                                   | -                   | -     | 16         | tttt/cttgg     | A1    |
| 25             | TWC         | Ay321118.1    | 2     | 2      | -/-       | -    | -                | -               | -                  | -                                                                                         | -                                   | 1x2 (27806 / 27919) | -     | -          | tttt/ttcgt     | A1    |
| 26             | HSR 1       | Ay323977.2    | 0     | 0      | -/-       | -    | -                | -               | -                  | -                                                                                         | -                                   | -                   | -     | 24         | tttt/ttcgt     | A1    |
| 27             | Taiwan TC1  | Ay338174.1    | 4     | 4      | -/-       | -    | 15               | 54              | -                  | -                                                                                         | -                                   | -                   | 85    | -          | tttt/cttgg     | A1    |
| 28             | Taiwan TC2  | Ay338175.1    | 9     | 9      | -/-       | -    | 15               | 54              | -                  | -                                                                                         | -                                   | -                   | 85    | -          | tttt/cttgg     | A1    |
| 29             | Taiwan TC3  | Ay348314.1    | 7     | 6      | -/-       | 1    | 15               | 54              | -                  | -                                                                                         | -                                   | -                   | 85    | -          | tttt/cttgg     | A1    |

| IDENTIFICATION |               |               | SNVs  |           |              |         |                     | INDELS             |                       |                       |                                                                                                                                                                                                                                                                                                                                                                                                     |                                                                   |       |          | CLASSIFICATION |       |
|----------------|---------------|---------------|-------|-----------|--------------|---------|---------------------|--------------------|-----------------------|-----------------------|-----------------------------------------------------------------------------------------------------------------------------------------------------------------------------------------------------------------------------------------------------------------------------------------------------------------------------------------------------------------------------------------------------|-------------------------------------------------------------------|-------|----------|----------------|-------|
| Label          | ID            | Accession No. | Total | Gene<br>s | 5'/3'<br>UTR | IG<br>R | 5' Del<br>-first 15 | 5' Del<br>-follow. | longIns               | longDel               | shortIns                                                                                                                                                                                                                                                                                                                                                                                            | shortDel                                                          | 3'del | 3'poly-a | Type           | Group |
| 30,31          | CUHK-AG01(02) | AY345986.1    | 3     | 3         | -/-          | -       | 15                  | -                  | -                     | -                     | -                                                                                                                                                                                                                                                                                                                                                                                                   | -                                                                 | -     | 24       | tttt/cttgg     | A1    |
| 32             | CUHK-AG03     | AY345988.1    | 5     | 4         | -/-          | 1       | 15                  | -                  | -                     | -                     | -                                                                                                                                                                                                                                                                                                                                                                                                   | -                                                                 | -     | 24       | tttt/cttgg     | A1    |
| 33             | PUMC01        | AY350750.1    | 3     | 2         | -/-          | 1       | 13                  | -                  | -                     | -                     | -                                                                                                                                                                                                                                                                                                                                                                                                   | -                                                                 | -     | 24       | tttt/ttcgg     | A1    |
| 34             | PUMC02        | AY357075.1    | 2     | 1         | -/-          | 1       | 14                  | -                  | -                     | -                     | -                                                                                                                                                                                                                                                                                                                                                                                                   | 1x2<br>(27869 /<br>27994 (1), 28024 (1))                          | -     | 27       | tttt/ttcgg     | A1    |
| 35             | PUMC03        | AY357076.1    | 4     | 3         | -/-          | 1       | 14                  | -                  | -                     | -                     | -                                                                                                                                                                                                                                                                                                                                                                                                   | 1x3 (26142 / 26260)                                               | -     | 35       | tttt/ttcgg     | A1    |
| 36             | ZMY 1         | Ay351680.1    | 78    | 77        | 1/-          | -       | -                   | -                  | -                     | -                     | 24x1<br>(1031, 1041,<br>1053, 2521,<br>2528, 3850,<br>4220, 4826,<br>6339, 6426,<br>7798, 8084,<br>11729 11782,<br>14063, 14113,<br>14134,14177,<br>14261, 14271,<br>19118, 20692,<br>22750, 25301<br>/<br>1067, 1077,<br>1089, 2558,<br>2565, 3887,<br>4257, 4863,<br>6377, 6464,<br>7836, 8122,<br>11777,11830,<br>14120, 14170,<br>14191,14234,<br>14318, 14328,<br>19178,20766,<br>22825,25381) | 2x1<br>(10601, 10609 / 10642,<br>10651)<br>1x2<br>(28734 / 28852) | -     | 2        | tttt/ttcgt     | B4    |
| 37,38          | TWH (TWC2)    | Ap006557.1    | 4     | 4         | -/-          | -       | -                   | -                  | -                     | -                     | -                                                                                                                                                                                                                                                                                                                                                                                                   | -                                                                 | -     | -        | tttt/cttgg     | A1    |
| 39             | TWK           | Ap006559.1    | 7     | 7         | -/-          | -       | -                   | -                  | -                     | -                     | -                                                                                                                                                                                                                                                                                                                                                                                                   | -                                                                 | -     | -        | tttt/cttgg     | A1    |
| 40             | TWS           | Ap006560.1    | 6     | 6         | -/-          | -       | -                   | -                  | -                     | -                     | -                                                                                                                                                                                                                                                                                                                                                                                                   | -                                                                 | -     | -        | tttt/cttgg     | A1    |
| 41             | TWY           | Ap006561.1    | 6     | 6         | -/-          | -       | -                   | -                  | -                     | -                     | -                                                                                                                                                                                                                                                                                                                                                                                                   | -                                                                 | -     | -        | tttt/cttgg     | A1    |
| 42             | TWC3          | Ay362699.1    | 3     | 3         | -/-          | -       | -                   | -                  | -                     | -                     | -                                                                                                                                                                                                                                                                                                                                                                                                   | -                                                                 | -     | -        | tttt/cttgg     | A1    |
| 43             | TWJ           | Ap006558.1    | 6     | 6         | -/-          | -       | -                   | -                  | -                     | -                     | -                                                                                                                                                                                                                                                                                                                                                                                                   | 1x2 (27167 / 27271)                                               | -     | -        | tttt/cttgg     | A1    |
| 44             | GZ02          | AY390556.1    | 39    | 39        | -/-          | -       | -                   | -                  | 29 (27884 /<br>27995) | -                     | -                                                                                                                                                                                                                                                                                                                                                                                                   | -                                                                 | -     | 4        | cgcc/tccat     | B2    |
| 45             | WHU           | Ay394850.2    | 15    | 15        | -/-          | -       | -                   | -                  | -                     | -                     | -                                                                                                                                                                                                                                                                                                                                                                                                   | 1x2 (27808 / 27919)                                               | -     | 3        | tttt/ttcgt     | A1    |
| 46             | HZS2-D        | AY394989.1    | 5     | 5         | -/-          | -       | 15                  | -                  | -                     | -                     | -                                                                                                                                                                                                                                                                                                                                                                                                   | -                                                                 | -     | 24       | tgcc/tccat     | A1    |
| 47             | HZS2-E        | AY394990.1    | 5     | 5         | -/-          | -       | 15                  | -                  | -                     | -                     | -                                                                                                                                                                                                                                                                                                                                                                                                   | -                                                                 | -     | 24       | tgcc/tccat     | A1    |
| 48             | HZS2-Fc       | AY394991.1    | 6     | 6         | -/-          | -       | 15                  | -                  | -                     | -                     | -                                                                                                                                                                                                                                                                                                                                                                                                   | -                                                                 | -     | 24       | tgcc/ttcgt     | A1    |
| 49             | HZS2-C        | AY394992.1    | 7     | 7         | -/-          | -       | 15                  | -                  | -                     | -                     | -                                                                                                                                                                                                                                                                                                                                                                                                   | -                                                                 | -     | 24       | tgcc/tccat     | A1    |
| 50             | HGZ8L2        | AY394993.1    | 7     | 7         | -/-          | -       | 15                  | -                  | -                     | -                     | -                                                                                                                                                                                                                                                                                                                                                                                                   | -                                                                 | -     | 24       | tgcc/tccat     | A1    |
| 51             | LC1           | AY394998.1    | 1     | 1         | -/-          | -       | 15                  | -                  | -                     | -                     | -                                                                                                                                                                                                                                                                                                                                                                                                   | -                                                                 | -     | 24       | tttt/ttcgg     | A1    |
| 52             | GZ-B          | AY394978.1    | 3     | 3         | -/-          | -       | 15                  | 57                 | -                     | 39 (27699 /<br>27882) | -                                                                                                                                                                                                                                                                                                                                                                                                   | -                                                                 | -     | 24       | tttt/ttcgt     | A3    |

| IDENTIFICATION |               |               | SNVs  |           |              |         | INDELS              |                    |                    |                                                     |                     |                                       |       | CLASSIFICATION |             |       |
|----------------|---------------|---------------|-------|-----------|--------------|---------|---------------------|--------------------|--------------------|-----------------------------------------------------|---------------------|---------------------------------------|-------|----------------|-------------|-------|
| Label          | ID            | Accession No. | Total | Gene<br>s | 5'/3'<br>UTR | IG<br>R | 5' Del<br>-first 15 | 5' Del<br>-follow. | longIns            | longDel                                             | shortIns            | shortDel                              | 3'del | 3'poly-a       | Type        | Group |
| 53             | GZ-C          | AY394979.1    | 14    | 14        | -/-          | -       | 15                  | 37                 | -                  | 39 (27719 / 27882),<br>12 (28039 / 28273)           | -                   | 1x3 (27791 / 27993 (2),<br>28024 (1)) | -     | 24             | cttt/ttctgt | A3    |
| 54             | HSZ2-A        | AY394983.1    | 5     | 5         | -/-          | -       | 15                  | 37                 | -                  | -                                                   | -                   | -                                     | -     | 24             | tgcc/ttcat  | A1    |
| 55             | HZS2-Fb       | AY394987.1    | 5     | 5         | -/-          | -       | 15                  | 27                 | -                  | -                                                   | -                   | -                                     | -     | 24             | tgcc/ttctgt | A1    |
| 56             | HSZ-Bb        | AY394985.1    | 14    | 14        | -/-          | -       | 15                  | 235                | 29 (27634 / 27995) | -                                                   | -                   | -                                     | -     | 24             | cgcc/tccat  | B2    |
| 57             | HSZ-Cb        | AY394986.1    | 16    | 16        | -/-          | -       | 15                  | 36                 | 29 (27833 / 27995) | -                                                   | -                   | -                                     | -     | 24             | cgcc/tccat  | B2    |
| 58             | HSZ-Bc        | AY394994.1    | 13    | 13        | -/-          | -       | 15                  | -                  | 29 (27869 / 27995) | -                                                   | -                   | -                                     | -     | 24             | cgcc/tccat  | B2    |
| 59             | HSZ-Cc        | AY394995.1    | 19    | 19        | -/-          | -       | 15                  | -                  | 29 (27869 / 27995) | -                                                   | -                   | -                                     | -     | 24             | cgcc/tccat  | B2    |
| 60,61          | ZS-A (ZS-B)   | AY394997.1    | 38    | 38        | -/-          | -       | 15                  | -                  | -                  | 53 (27843 / 27969 (26),<br>28024 (27))              | -                   | -                                     | -     | 24             | cgcc/tccat  | B3    |
| 62             | ZS-C          | AY395003.1    | 38    | 38        | -/-          | -       | 15                  | 36                 | -                  | 53 (27807 / 27969 (26),<br>28024 (27))              | -                   | -                                     | -     | 24             | cgcc/tccat  | B3    |
| 63             | LC2           | AY394999.1    | 4     | 4         | -/-          | -       | 15                  | -                  | -                  | 386 (27704 / 27829)                                 | -                   | -                                     | -     | 24             | ttt-/ttctgt | A3    |
| 64,65          | LC4 (LC3)     | AY395001.1    | 3     | 3         | -/-          | -       | 15                  | -                  | -                  | 386 (27704 / 27829)                                 | -                   | -                                     | -     | 24             | ttt-/ttctgt | A3    |
| 66             | LC5           | AY395002.1    | 4     | 4         | -/-          | -       | 15                  | -                  | -                  | 386 (27704 / 27829)                                 | -                   | -                                     | -     | 24             | ttt-/ttctgt | A3    |
| 67             | AS            | Ay427439.1    | 0     | 0         | -/-          | -       | 15                  | 1                  | -                  | -                                                   | -                   | -                                     | -     | -              | tttt/ttctgt | A1    |
| 68             | SoD           | AY461660.1    | 30    | 10        | 1/19         | -       | 15                  | -                  | -                  | -                                                   | -                   | -                                     | -     | -              | tttt/ttctgt | A1    |
| 69             | ShanghaiQX C1 | AY463059.1    | 39    | 39        | -/-          | -       | 15                  | 64                 | -                  | -                                                   | -                   | -                                     | 56    | -              | cggt/ttctgt | B1    |
| 70             | ShanghaiQX C2 | AY463060.1    | 39    | 39        | -/-          | -       | 15                  | 64                 | -                  | 579 (5834 / 5959 (418),<br>6378 (86),<br>6465 (75)) | -                   | -                                     | 56    | -              | cggt/ttctgt | B1    |
| 71             | Sino1-11      | AY485277.1    | 6     | 6         | -/-          | -       | -                   | -                  | -                  | -                                                   | -                   | 1x3 (26156 / 26260)                   | -     | 17             | tttt/ttctgg | A1    |
| 72             | Sino3-11      | AY485278.1    | 3     | 3         | -/-          | -       | -                   | -                  | -                  | -                                                   | -                   | 1x2 (27883 / 27994 (1),<br>28024 (1)) | -     | 15             | tttt/ttctgg | A1    |
| 73,74          | TW2 (TW1)     | Ay502925.1    | 1     | 1         | -/-          | -       | -                   | -                  | -                  | -                                                   | -                   | -                                     | -     | 2              | tttt/ttctgt | A1    |
| 75             | TW3           | AY502926.1    | 2     | 2         | -/-          | -       | -                   | -                  | -                  | -                                                   | -                   | -                                     | -     | 2              | tttt/ttctgt | A1    |
| 76             | TW4           | AY502927.1    | 2     | 2         | -/-          | -       | -                   | -                  | -                  | -                                                   | -                   | -                                     | -     | 2              | tttt/ttctgt | A1    |
| 77             | TW5           | AY502928.1    | 1     | 1         | -/-          | -       | -                   | -                  | -                  | -                                                   | -                   | -                                     | -     | 2              | tttt/ttctgg | A1    |
| 78             | TW6           | AY502929.1    | 3     | 3         | -/-          | -       | -                   | -                  | -                  | -                                                   | -                   | -                                     | -     | 2              | tttt/cttgg  | A1    |
| 79             | TW7           | AY502930.1    | 4     | 4         | -/-          | -       | -                   | -                  | -                  | -                                                   | -                   | -                                     | -     | 2              | tttt/cttgg  | A1    |
| 80             | TW8           | AY502931.1    | 3     | 3         | -/-          | -       | -                   | -                  | -                  | -                                                   | -                   | -                                     | -     | 2              | tttt/cttgg  | A1    |
| 81             | TW9           | AY502932.1    | 5     | 4         | -/-          | 1       | -                   | -                  | -                  | -                                                   | -                   | -                                     | -     | 2              | tttt/cttgg  | A1    |
| 82             | TW10          | AY502923.1    | 6     | 5         | -/-          | 1       | -                   | -                  | -                  | -                                                   | -                   | -                                     | -     | 2              | tttt/cttgg  | A1    |
| 83             | TW11          | AY502924.1    | 9     | 8         | -/-          | 1       | -                   | -                  | -                  | -                                                   | -                   | 1x2 (27068 / 21172)                   | -     | 2              | tttt/cttgg  | A1    |
| 84             | Sin842        | AY559081.1    | 4     | 4         | -/-          | -       | 13                  | -                  | -                  | -                                                   | 1x1 (13953 / 14034) | -                                     | -     | 1              | tttt/ttctgt | A1    |
| 85             | Sin852        | AY559082.1    | 19    | 9         | 10/-         | -       | 1                   | -                  | -                  | 57 (27797 /                                         | -                   | -                                     | -     | 1              | ttt-/ttctgt | A3    |

| IDENTIFICATION |               |               | SNVs  |        |           |      | INDELs           |                 |         |                                      |                                                                                                                                                       |                                                                                                     |       |          | CLASSIFICATION |       |
|----------------|---------------|---------------|-------|--------|-----------|------|------------------|-----------------|---------|--------------------------------------|-------------------------------------------------------------------------------------------------------------------------------------------------------|-----------------------------------------------------------------------------------------------------|-------|----------|----------------|-------|
| Label          | ID            | Accession No. | Total | Gene s | 5'/3' UTR | IG R | 5' Del -first 15 | 5' Del -follow. | longIns | longDel                              | shortIns                                                                                                                                              | shortDel                                                                                            | 3'del | 3'poly-a | Type           | Group |
|                |               |               |       |        |           |      |                  |                 |         | 27909)                               |                                                                                                                                                       |                                                                                                     |       |          |                |       |
| 86             | Sin3765V      | AY559084.1    | 9     | 9      | -/-       | -    | 15               | 1               | -       | -                                    | -                                                                                                                                                     | -                                                                                                   | -     | 11       | tttt/ttctgt    | A1    |
| 87             | Sin848        | AY559085.1    | 11    | 11     | -/-       | -    | 15               | 1               | -       | -                                    | -                                                                                                                                                     | -                                                                                                   | -     | 2        | tttt/ttctgt    | A1    |
| 88             | Sin849        | AY559086.1    | 4     | 4      | -/-       | -    | 15               | 1               | -       | 49 (27745 / 27872)                   | -                                                                                                                                                     | -                                                                                                   | 1     | -        | tttt/ttctgt    | A3    |
| 89             | Sin846        | AY559094.1    | 7     | 7      | -/-       | -    | 15               | 1               | -       | 137 (27663 / 27787 (66), 27854 (71)) | 2x1 (9567, 9667 / 9634, 9734)                                                                                                                         | -                                                                                                   | -     | 1        | tttt/ttctgt    | A3    |
| 90             | Sin3725V      | AY559087.1    | 4     | 4      | -/-       | -    | 15               | 1               | -       | -                                    | -                                                                                                                                                     | -                                                                                                   | -     | 5        | tttt/ttctgt    | A1    |
| 91             | SinP1         | AY559088.1    | 4     | 4      | -/-       | -    | 15               | 1               | -       | -                                    | 2x1 (2488, 25277 / 2543, 25394)                                                                                                                       | -                                                                                                   | -     | 1        | tttt/ttctgt    | A1    |
| 92             | SinP3         | AY559090.1    | 9     | 4      | 1/4       | -    | 15               | 1               | -       | -                                    | 2x2, (10, 25286 / 60, 25394)<br>9x1 (10651,10697,11112,11567,11782,11933,11988,22506, 29716 / 10718,10764,11179,11634,11852,12003,12058,22607, 29860) | -                                                                                                   | -     | 1        | tttt/ttctgt    | A4    |
| 93             | SinP5         | AY559092.1    | 4     | 4      | -/-       | -    | 15               | 1               | -       | -                                    | 1x2 (25276 / 25394)                                                                                                                                   | 1x1(28088 / 28242)                                                                                  | -     | 1        | tttt/ttctgt    | A1    |
| 94             | SinP4         | AY559091.1    | 7     | 4      | -/3       | -    | 15               | 1               | -       | -                                    | 1x2 (25274 / 25394)                                                                                                                                   | 2x1 (24085, 24106 / 24201, 24223)                                                                   | 1     | -        | tttt/ttctgt    | A1    |
| 95             | Sin845        | AY559093.1    | 10    | 10     | -/-       | -    | 15               | 1               | -       | -                                    | -                                                                                                                                                     | -                                                                                                   | -     | 1        | tttt/ttctgt    | A1    |
| 96             | Sin847        | AY559095.1    | 12    | 10     | 2/-       | -    | 10               | -               | -       | -                                    | -                                                                                                                                                     | -                                                                                                   | -     | 2        | tttt/ttctgt    | A1    |
| 97             | Sin850        | AY559096.1    | 11    | 6      | 5/-       | -    | 8                | -               | -       | -                                    | -                                                                                                                                                     | -                                                                                                   | -     | 1        | tttt/ttctgt    | A1    |
| 98             | LLJ-2004      | AY595412.1    | 11    | 10     | -/-       | 1    | 15               | 6               | -       | -                                    | 1x6 (27637 / 27763)                                                                                                                                   | 1x1 (2919 / 2982)                                                                                   | -     | 5        | cgcc/ttcat     | B1    |
| 99             | TJF           | AY654624.1    | 17    | 10     | 2/1       | 4    | 1                | -               | -       | -                                    | -                                                                                                                                                     | -                                                                                                   | -     | 19       | tgcc/ttctgt    | B1    |
| 100            | CDC#200301157 | AY714217.1    | 2     | 2      | -         | -    | -                | -               | -       | -                                    | -                                                                                                                                                     | -                                                                                                   | -     | -        | tttt/ttctgt    | A1    |
| 101            | Sin3408L      | AY559097.1    | 4     | 4      | -         | -    | 15               | 1               | -       | -                                    | 1x1 (5120 / 5181)                                                                                                                                     | 2x1 (24524, 25029 / 24639, 25145)                                                                   | -     | 5        | tttt/ttctgt    | A1    |
| 102            | SinP2         | AY559089.1    | 4     | 4      | -         | -    | 15               | 1               | -       | -                                    | 13x1 (10649,11638,13060,17980,19282,19497,19928,20029,23499,23543,23589,23607, 25127 / 10718,11710,13138,18071,19374,19589,200                        | 5x1 (16584, 25141, 25144, 25169, 25171 / 16674, 25246, 25250, 25276, 25279),<br>1x6 (25189 / 25298) | -     | 2        | tttt/ttctgt    | A4    |



| IDENTIFICATION |         |               | SNVs  |       |           |     | INDELs           |                 |            |         |                                                                            |          |       | CLASSIFICATION |          |       |
|----------------|---------|---------------|-------|-------|-----------|-----|------------------|-----------------|------------|---------|----------------------------------------------------------------------------|----------|-------|----------------|----------|-------|
| Label          | ID      | Accession No. | Total | Genes | 5'/3' UTR | IGR | 5' Del -first 15 | 5' Del -follow. | longIns    | longDel | shortIns                                                                   | shortDel | 3'del | 3'poly-a       | Type     | Group |
|                |         |               |       |       |           |     |                  |                 |            |         | 20,20121,<br>23604,23648,23694,23712,<br>25232),<br>1x2 (25278 /<br>25394) |          |       |                |          |       |
| 103            | Sin3408 | AY559083.1    | 14    | 4     | 10/-      | -   | -                | -               | 5'end (34) | -       | -                                                                          | -        | -     | 6              | ttn/tcgt | A1    |

**Table S3. RSCU for all the annotated proteins and in total, for all the annotated isolates.**

The highest RSCU synonymous codons are in bold

| a.a. | codon | TOTAL       | Spike       | Envel.      | Membr.      | Nucleo.     | 1AB         | Other       |
|------|-------|-------------|-------------|-------------|-------------|-------------|-------------|-------------|
| Ala  | gca   | 1.11        | 0.86        | 0.00        | 0.63        | 1.06        | 1.16        | 1.32        |
|      | gcc   | 0.59        | 0.57        | 1.00        | 0.84        | 0.94        | 0.55        | 0.54        |
|      | gcg   | 0.24        | 0.24        | <b>2.00</b> | 0.42        | 0.35        | 0.2         | 0.40        |
|      | gct   | <b>2.07</b> | <b>2.33</b> | 1.00        | <b>2.10</b> | <b>1.65</b> | <b>2.09</b> | <b>1.74</b> |
| Arg  | aga   | <b>2.09</b> | <b>1.85</b> | 0.00        | 0.80        | <b>1.94</b> | <b>2.22</b> | <b>2.20</b> |
|      | agg   | 0.97        | <b>1.85</b> | 0.00        | 0.80        | 0.39        | 0.85        | 1.68        |
|      | cga   | 0.47        | 0.61        | <b>3.00</b> | 0.80        | 1.16        | 0.26        | 1.13        |
|      | cgc   | 0.76        | 0.46        | 0.00        | 1.20        | 1.55        | 0.76        | 0.15        |
|      | cgg   | 0.12        | 0.15        | 0.00        | 0.80        | 0.00        | 0.07        | 0.24        |
|      | cgt   | 1.59        | 1.07        | <b>3.00</b> | <b>1.60</b> | 0.97        | 1.85        | 0.60        |
| Asn  | aac   | 0.75        | 0.69        | 0.80        | <b>1.23</b> | 0.72        | 0.74        | 0.93        |
|      | aat   | <b>1.25</b> | <b>1.31</b> | <b>1.20</b> | 0.77        | <b>1.28</b> | <b>1.26</b> | <b>1.07</b> |
| Asp  | gac   | 0.75        | 0.63        | 0.00        | <b>1.67</b> | <b>1.09</b> | 0.72        | <b>1.21</b> |
|      | gat   | <b>1.25</b> | <b>1.37</b> | <b>2.00</b> | 0.33        | 0.91        | <b>1.28</b> | 0.79        |
| Cys  | tgc   | 0.75        | 0.93        | <b>1.33</b> | 0.32        | 0.00        | 0.69        | <b>1.06</b> |
|      | tgt   | <b>1.25</b> | <b>1.07</b> | 0.67        | <b>1.68</b> | <b>2.00</b> | <b>1.31</b> | 0.94        |
| Gln  | caa   | <b>1.21</b> | <b>1.60</b> | 0.00        | <b>1.20</b> | <b>1.41</b> | <b>1.31</b> | <b>1.13</b> |
|      | cag   | 0.79        | 0.40        | 0.00        | 0.80        | 0.59        | 1           | 0.87        |
| Glu  | gaa   | <b>1.05</b> | 1.00        | <b>2.00</b> | <b>1.15</b> | 1.00        | 0.69        | 0.79        |
|      | gag   | 0.95        | 1.00        | 0.00        | 0.85        | 1.00        | <b>1.1</b>  | <b>1.21</b> |
| Gly  | gga   | 0.91        | 1.01        | 2.00        | 0.80        | 1.42        | 0.9         | 0.71        |
|      | ggc   | 1.01        | 1.26        | 0.00        | 0.80        | 1.42        | 1.07        | 1.38        |
|      | ggg   | 0.18        | 0.20        | 0.00        | 0.80        | 0.27        | 0.14        | 0.18        |
|      | ggt   | <b>1.9</b>  | <b>1.52</b> | 2.00        | <b>1.60</b> | 0.89        | 2.11        | <b>1.73</b> |
| His  | cac   | 0.71        | 0.27        | 0.00        | <b>2.00</b> | 0.80        | 0.68        | <b>1.05</b> |
|      | cat   | <b>1.29</b> | <b>1.73</b> | 0.00        | 0.00        | <b>1.20</b> | 1.32        | 0.95        |
| Ile  | ata   | 0.66        | 0.54        | 1.00        | 0.50        | 0.28        | 0.65        | 1.05        |
|      | atc   | 0.63        | 0.35        | 1.00        | 0.33        | 0.81        | 0.72        | 0.51        |
|      | att   | <b>1.7</b>  | <b>2.11</b> | 1.00        | <b>2.17</b> | <b>1.91</b> | 1.62        | <b>1.44</b> |
| Leu  | cta   | 0.69        | 0.61        | 0.86        | 1.16        | 1.15        | 0.6         | 1.15        |
|      | ctc   | 0.82        | 1.15        | 0.00        | 1.15        | 0.69        | 0.8         | 0.69        |
|      | ctg   | 0.59        | 0.24        | 0.86        | 0.58        | 0.92        | 0.62        | 0.60        |
|      | ctt   | <b>1.76</b> | <b>2.06</b> | <b>2.57</b> | <b>1.55</b> | <b>1.62</b> | 1.76        | <b>1.44</b> |
|      | tta   | 1.06        | 1.15        | 0.86        | 0.58        | 0.23        | 1.11        | 0.98        |
|      | ttg   | 1.08        | 0.79        | 0.86        | 0.97        | 1.38        | 1.11        | 1.13        |
| Lys  | aaa   | <b>1.06</b> | <b>1.13</b> | <b>2.00</b> | <b>1.33</b> | <b>1.38</b> | 1.03        | <b>1.03</b> |
|      | aag   | 0.94        | 0.87        | 0.00        | 0.67        | 0.62        | 0.97        | 0.97        |
| Met  | atg   | 1           | 1.00        | 1.00        | 1.00        | 1.00        | 1           | 1.00        |
| Phe  | ttc   | 0.76        | 0.58        | <b>1.49</b> | <b>1.04</b> | <b>1.39</b> | 0.78        | 0.68        |
|      | ttt   | <b>1.24</b> | <b>1.42</b> | 0.51        | 0.96        | 0.61        | 1.22        | <b>1.32</b> |
| Pro  | cca   | 1.7         | 1.33        | 2.00        | <b>2.32</b> | 1.29        | 1.79        | <b>1.91</b> |
|      | ccc   | 0.41        | 0.22        | 0.00        | 0.06        | 1.16        | 0.37        | 0.51        |
|      | ccg   | 0.17        | 0.14        | 0.00        | 0.83        | 0.26        | 0.12        | 0.49        |
|      | cct   | <b>1.72</b> | <b>2.31</b> | 2.00        | 0.79        | 1.29        | 1.72        | 1.08        |
| Ser  | agc   | 0.53        | 0.38        | 0.86        | 1.00        | 0.86        | 0.47        | 1.06        |
|      | agt   | 1.13        | 0.69        | 0.86        | 0.50        | 1.20        | 1.28        | 0.69        |
|      | tca   | 1.76        | 1.75        | 0.86        | <b>2.00</b> | 1.54        | 1.75        | <b>2.24</b> |
|      | tcc   | 0.41        | 0.44        | 0.00        | 1.00        | 0.51        | 0.4         | 0.25        |
|      | tcg   | 0.24        | 0.19        | <b>1.71</b> | 0.50        | 0.17        | 0.18        | 0.76        |
|      | tct   | <b>1.92</b> | <b>2.56</b> | <b>1.71</b> | 1.00        | <b>1.71</b> | 1.92        | 1.01        |
| Thr  | aca   | 1.56        | 1.49        | 1.60        | <b>1.54</b> | 1.34        | 1.63        | 1.30        |
|      | acc   | 0.55        | 0.48        | 0.00        | 0.92        | 0.61        | 0.54        | 0.65        |
|      | acg   | 0.19        | 0.16        | 1.60        | 0.31        | 0.00        | 0.16        | 0.44        |
|      | act   | <b>1.69</b> | <b>1.86</b> | 0.80        | 1.24        | <b>2.06</b> | 1.67        | <b>1.60</b> |
| Trp  | tgg   | 1           | 1.00        | 0.00        | 1.00        | 1.00        | 1           | 1.00        |
| Tyr  | tac   | 0.88        | 0.67        | <b>1.99</b> | <b>1.33</b> | <b>1.64</b> | 0.86        | 0.88        |
|      | tat   | <b>1.12</b> | <b>1.33</b> | 0.01        | 0.67        | 0.36        | 1.14        | <b>1.12</b> |
| Val  | gta   | 0.85        | 0.53        | 0.86        | 1.25        | 0.36        | 0.9         | 0.83        |
|      | gtc   | 0.69        | 0.83        | 0.79        | 0.50        | 1.46        | 0.67        | 0.40        |
|      | gtg   | 0.79        | 0.57        | 0.57        | <b>1.50</b> | 0.73        | 0.79        | 1.01        |
|      | gtt   | <b>1.68</b> | <b>2.07</b> | <b>1.78</b> | 0.76        | 1.46        | 1.64        | <b>1.75</b> |
| End  | taa   | <b>1.98</b> | <b>3.00</b> | <b>3.00</b> | <b>3.00</b> | <b>3.00</b> | 0.93        | <b>1.85</b> |
|      | tag   | 0.42        | 0.00        | 0.00        | 0.00        | 0.00        | 0.85        | 0.22        |
|      | tga   | 0.6         | 0.00        | 0.00        | 0.00        | 0.00        | 0.9         | 0.94        |

**Table S4. Positions of multiple SNVs in annotated isolates.**  
Positions of two or more SNVs are presented along with nucleotides and ORFs (based on HSR 1 annotation), type of mutation (transition / transversion), a.a. position in ORF, a.a. change, a.a. properties change, nucleotide position in codon and the number of SNVs. SNVs are in red.

| Nucleotide position on HSR 1 scale | 508 | 509 | 510 | 511 | 512 | 513 | 514 | 515 | 516 | 517 | 518 | 519 | 520 | 521 | 522 | 523 | 524 | 525 | 526 | 527 | 528 | 529 | 530 | 531 | 532 | 533 | 534 | 535 | 536 | 537 | 538 | 539 | 540 | 541 | 542 | 543 | 544 | 545 | 546 | 547 | 548 | 549 | 550 | 551 | 552 | 553 | 554 | 555 | 556 | 557 | 558 | 559 | 560 | 561 | 562 | 563 | 564 | 565 | 566 | 567 | 568 | 569 | 570 | 571 | 572 | 573 | 574 | 575 | 576 | 577 | 578 | 579 | 580 | 581 | 582 | 583 | 584 | 585 | 586 | 587 | 588 | 589 | 590 | 591 | 592 | 593 | 594 | 595 | 596 | 597 | 598 | 599 | 600 | 601 | 602 | 603 | 604 | 605 | 606 | 607 | 608 | 609 | 610 | 611 | 612 | 613 | 614 | 615 | 616 | 617 | 618 | 619 | 620 | 621 | 622 | 623 | 624 | 625 | 626 | 627 | 628 | 629 | 630 | 631 | 632 | 633 | 634 | 635 | 636 | 637 | 638 | 639 | 640 | 641 | 642 | 643 | 644 | 645 | 646 | 647 | 648 | 649 | 650 | 651 | 652 | 653 | 654 | 655 | 656 | 657 | 658 | 659 | 660 | 661 | 662 | 663 | 664 | 665 | 666 | 667 | 668 | 669 | 670 | 671 | 672 | 673 | 674 | 675 | 676 | 677 | 678 | 679 | 680 | 681 | 682 | 683 | 684 | 685 | 686 | 687 | 688 | 689 | 690 | 691 | 692 | 693 | 694 | 695 | 696 | 697 | 698 | 699 | 700 | 701 | 702 | 703 | 704 | 705 | 706 | 707 | 708 | 709 | 710 | 711 | 712 | 713 | 714 | 715 | 716 | 717 | 718 | 719 | 720 | 721 | 722 | 723 | 724 | 725 | 726 | 727 | 728 | 729 | 730 | 731 | 732 | 733 | 734 | 735 | 736 | 737 | 738 | 739 | 740 | 741 | 742 | 743 | 744 | 745 | 746 | 747 | 748 | 749 | 750 | 751 | 752 | 753 | 754 | 755 | 756 | 757 | 758 | 759 | 760 | 761 | 762 | 763 | 764 | 765 | 766 | 767 | 768 | 769 | 770 | 771 | 772 | 773 | 774 | 775 | 776 | 777 | 778 | 779 | 780 | 781 | 782 | 783 | 784 | 785 | 786 | 787 | 788 | 789 | 790 | 791 | 792 | 793 | 794 | 795 | 796 | 797 | 798 | 799 | 800 | 801 | 802 | 803 | 804 | 805 | 806 | 807 | 808 | 809 | 810 | 811 | 812 | 813 | 814 | 815 | 816 | 817 | 818 | 819 | 820 | 821 | 822 | 823 | 824 | 825 | 826 | 827 | 828 | 829 | 830 | 831 | 832 | 833 | 834 | 835 | 836 | 837 | 838 | 839 | 840 | 841 | 842 | 843 | 844 | 845 | 846 | 847 | 848 | 849 | 850 | 851 | 852 | 853 | 854 | 855 | 856 | 857 | 858 | 859 | 860 | 861 | 862 | 863 | 864 | 865 | 866 | 867 | 868 | 869 | 870 | 871 | 872 | 873 | 874 | 875 | 876 | 877 | 878 | 879 | 880 | 881 | 882 | 883 | 884 | 885 | 886 | 887 | 888 | 889 | 890 | 891 | 892 | 893 | 894 | 895 | 896 | 897 | 898 | 899 | 900 | 901 | 902 | 903 | 904 | 905 | 906 | 907 | 908 | 909 | 910 | 911 | 912 | 913 | 914 | 915 | 916 | 917 | 918 | 919 | 920 | 921 | 922 | 923 | 924 | 925 | 926 | 927 | 928 | 929 | 930 | 931 | 932 | 933 | 934 | 935 | 936 | 937 | 938 | 939 | 940 | 941 | 942 | 943 | 944 | 945 | 946 | 947 | 948 | 949 | 950 | 951 | 952 | 953 | 954 | 955 | 956 | 957 | 958 | 959 | 960 | 961 | 962 | 963 | 964 | 965 | 966 | 967 | 968 | 969 | 970 | 971 | 972 | 973 | 974 | 975 | 976 | 977 | 978 | 979 | 980 | 981 | 982 | 983 | 984 | 985 | 986 | 987 | 988 | 989 | 990 | 991 | 992 | 993 | 994 | 995 | 996 | 997 | 998 | 999 | 1000 | 1001 | 1002 | 1003 | 1004 | 1005 | 1006 | 1007 | 1008 | 1009 | 1010 | 1011 | 1012 | 1013 | 1014 | 1015 | 1016 | 1017 | 1018 | 1019 | 1020 | 1021 | 1022 | 1023 | 1024 | 1025 | 1026 | 1027 | 1028 | 1029 | 1030 | 1031 | 1032 | 1033 | 1034 | 1035 | 1036 | 1037 | 1038 | 1039 | 1040 | 1041 | 1042 | 1043 | 1044 | 1045 | 1046 | 1047 | 1048 | 1049 | 1050 | 1051 | 1052 | 1053 | 1054 | 1055 | 1056 | 1057 | 1058 | 1059 | 1060 | 1061 | 1062 | 1063 | 1064 | 1065 | 1066 | 1067 | 1068 | 1069 | 1070 | 1071 | 1072 | 1073 | 1074 | 1075 | 1076 | 1077 | 1078 | 1079 | 1080 | 1081 | 1082 | 1083 | 1084 | 1085 | 1086 | 1087 | 1088 | 1089 | 1090 | 1091 | 1092 | 1093 | 1094 | 1095 | 1096 | 1097 | 1098 | 1099 | 1100 | 1101 | 1102 | 1103 | 1104 | 1105 | 1106 | 1107 | 1108 | 1109 | 1110 | 1111 | 1112 | 1113 | 1114 | 1115 | 1116 | 1117 | 1118 | 1119 | 1120 | 1121 | 1122 | 1123 | 1124 | 1125 | 1126 | 1127 | 1128 | 1129 | 1130 | 1131 | 1132 | 1133 | 1134 | 1135 | 1136 | 1137 | 1138 | 1139 | 1140 | 1141 | 1142 | 1143 | 1144 | 1145 | 1146 | 1147 | 1148 | 1149 | 1150 | 1151 | 1152 | 1153 | 1154 | 1155 | 1156 | 1157 | 1158 | 1159 | 1160 | 1161 | 1162 | 1163 | 1164 | 1165 | 1166 | 1167 | 1168 | 1169 | 1170 | 1171 | 1172 | 1173 | 1174 | 1175 | 1176 | 1177 | 1178 | 1179 | 1180 | 1181 | 1182 | 1183 | 1184 | 1185 | 1186 | 1187 | 1188 | 1189 | 1190 | 1191 | 1192 | 1193 | 1194 | 1195 | 1196 | 1197 | 1198 | 1199 | 1200 | 1201 | 1202 | 1203 | 1204 | 1205 | 1206 | 1207 | 1208 | 1209 | 1210 | 1211 | 1212 | 1213 | 1214 | 1215 | 1216 | 1217 | 1218 | 1219 | 1220 | 1221 | 1222 | 1223 | 1224 | 1225 | 1226 | 1227 | 1228 | 1229 | 1230 | 1231 | 1232 | 1233 | 1234 | 1235 | 1236 | 1237 | 1238 | 1239 | 1240 | 1241 | 1242 | 1243 | 1244 | 1245 | 1246 | 1247 | 1248 | 1249 | 1250 | 1251 | 1252 | 1253 | 1254 | 1255 | 1256 | 1257 | 1258 | 1259 | 1260 | 1261 | 1262 | 1263 | 1264 | 1265 | 1266 | 1267 | 1268 | 1269 | 1270 | 1271 | 1272 | 1273 | 1274 | 1275 | 1276 | 1277 | 1278 | 1279 | 1280 | 1281 | 1282 | 1283 | 1284 | 1285 | 1286 | 1287 | 1288 | 1289 | 1290 | 1291 | 1292 | 1293 | 1294 | 1295 | 1296 | 1297 | 1298 | 1299 | 1300 | 1301 | 1302 | 1303 | 1304 | 1305 | 1306 | 1307 | 1308 | 1309 | 1310 | 1311 | 1312 | 1313 | 1314 | 1315 | 1316 | 1317 | 1318 | 1319 | 1320 | 1321 | 1322 | 1323 | 1324 | 1325 | 1326 | 1327 | 1328 | 1329 | 1330 | 1331 | 1332 | 1333 | 1334 | 1335 | 1336 | 1337 | 1338 | 1339 | 1340 | 1341 | 1342 | 1343 | 1344 | 1345 | 1346 | 1347 | 1348 | 1349 | 1350 | 1351 | 1352 | 1353 | 1354 | 1355 | 1356 | 1357 | 1358 | 1359 | 1360 | 1361 | 1362 | 1363 | 1364 | 1365 | 1366 | 1367 | 1368 | 1369 | 1370 | 1371 | 1372 | 1373 | 1374 | 1375 | 1376 | 1377 | 1378 | 1379 | 1380 | 1381 | 1382 | 1383 | 1384 | 1385 | 1386 | 1387 | 1388 | 1389 | 1390 | 1391 | 1392 | 1393 | 1394 | 1395 | 1396 | 1397 | 1398 | 1399 | 1400 | 1401 | 1402 | 1403 | 1404 | 1405 | 1406 | 1407 | 1408 | 1409 | 1410 | 1411 | 1412 | 1413 | 1414 | 1415 | 1416 | 1417 | 1418 | 1419 | 1420 | 1421 | 1422 | 1423 | 1424 | 1425 | 1426 | 1427 | 1428 | 1429 | 1430 | 1431 | 1432 | 1433 | 1434 | 1435 | 1436 | 1437 | 1438 | 1439 | 1440 | 1441 | 1442 | 1443 | 1444 | 1445 | 1446 | 1447 | 1448 | 1449 | 1450 | 1451 | 1452 | 1453 | 1454 | 1455 | 1456 | 1457 | 1458 | 1459 | 1460 | 1461 | 1462 | 1463 | 1464 | 1465 | 1466 | 1467 | 1468 | 1469 | 1470 | 1471 | 1472 | 1473 | 1474 | 1475 | 1476 | 1477 | 1478 | 1479 | 1480 | 1481 | 1482 | 1483 | 1484 | 1485 | 1486 | 1487 | 1488 | 1489 | 1490 | 1491 | 1492 | 1493 | 1494 | 1495 | 1496 | 1497 | 1498 | 1499 | 1500 | 1501 | 1502 | 1503 | 1504 | 1505 | 1506 | 1507 | 1508 | 1509 | 1510 | 1511 | 1512 | 1513 | 1514 | 1515 | 1516 | 1517 | 1518 | 1519 | 1520 | 1521 | 1522 | 1523 | 1524 | 1525 | 1526 | 1527 | 1528 | 1529 | 1530 | 1531 | 1532 | 1533 | 1534 | 1535 | 1536 | 1537 | 1538 | 1539 | 1540 | 1541 | 1542 | 1543 | 1544 | 1545 | 1546 | 1547 | 1548 | 1549 | 1550 | 1551 | 1552 | 1553 | 1554 | 1555 | 1556 | 1557 | 1558 | 1559 | 1560 | 1561 | 1562 | 1563 | 1564 | 1565 | 1566 | 1567 | 1568 | 1569 | 1570 | 1571 | 1572 | 1573 | 1574 | 1575 | 1576 | 1577 | 1578 | 1579 | 1580 | 1581 | 1582 | 1583 | 1584 | 1585 | 1586 | 1587 | 1588 | 1589 | 1590 | 1591 | 1592 | 1593 | 1594 | 1595 | 1596 | 1597 | 1598 | 1599 | 1600 | 1601 | 1602 | 1603 | 1604 | 1605 | 1606 | 1607 | 1608 | 1609 | 1610 | 1611 | 1612 | 1613 | 1614 | 1615 | 1616 | 1617 | 1618 | 1619 | 1620 | 1621 | 1622 | 1623 | 1624 | 1625 | 1626 | 1627 | 1628 | 1629 | 1630 | 1631 | 1632 | 1633 | 1634 | 1635 | 1636 | 1637 | 1638 | 1639 | 1640 | 1641 | 1642 | 1643 | 1644 | 1645 | 1646 | 1647 | 1648 | 1649 | 1650 | 1651 | 1652 | 1653 | 1654 | 1655 | 1656 | 1657 | 1658 | 1659 | 1660 | 1661 | 1662 | 1663 | 1664 | 1665 | 1666 | 1667 | 1668 | 1669 | 1670 | 1671 | 1672 | 1673 | 1674 | 1675 | 1676 | 1677 | 1678 | 1679 | 1680 | 1681 | 1682 | 1683 | 1684 | 1685 | 1686 | 1687 | 1688 | 1689 | 1690 | 1691 | 1692 | 1693 | 1694 | 1695 | 1696 | 1697 | 1698 | 1699 | 1700 | 1701 | 1702 | 1703 | 1704 | 1705 | 1706 | 1707 | 1708 | 1709 | 1710 | 1711 | 1712 | 1713 | 1714 | 1715 | 1716 | 1717 | 1718 | 1719 | 1720 | 1721 | 1722 | 1723 | 1724 | 1725 | 1726 | 1727 | 1728 | 1729 | 1730 | 1731 | 1732 | 1733 | 1734 | 1735 | 1736 | 1737 | 1738 | 1739 | 1740 | 1741 | 1742 | 1743 | 1744 | 1745 | 1746 | 1747 | 1748 | 1749 | 1750 | 1751 | 1752 | 1753 | 1754 | 1755 | 1756 | 1757 | 1758 | 1759 | 1760 | 1761 | 1762 | 1763 | 1764 | 1765 | 1766 | 1767 | 1768 | 1769 | 1770 | 1771 | 1772 | 1773 | 1774 | 1775 | 1776 | 1777 | 1778 | 1779 | 1780 | 1781 | 1782 | 1783 | 1784 | 1785 | 1786 | 1787 | 1788 | 1789 | 1790 | 1791 | 1792 | 1793 | 1794 | 1795 | 1796 | 1797 | 1798 | 1799 | 1800 | 1801 | 1802 | 1803 | 1804 | 1805 | 1806 | 1807 | 1808 | 1809 | 1810 | 1811 | 1812 | 1813 | 1814 | 1815 | 1816 | 1817 | 1818 | 1819 | 1820 | 1821 | 1822 | 1823 | 1824 | 1825 | 1826 | 1827 | 1828 | 1829 | 1830 | 1831 | 1832 | 1833 | 1834 | 1835 | 1836 | 1837 | 1838 | 1839 | 1840 | 1841 | 1842 | 1843 | 1844 | 1845 | 1846 | 1847 | 1848 | 1849 | 1850 | 1851 | 1852 | 1853 | 1854 | 1855 | 1856 | 1857 | 1858 | 1859 | 1860 | 1861 | 1862 | 1863 | 1864 | 1865 | 1866 | 1867 | 1868 | 1869 | 1870 | 1871 | 1872 | 1873 | 1874 | 1875 | 1876 | 1877 | 1878 | 1879 | 1880 | 1881 | 1882 | 1883 | 1884 | 1885 | 1886 | 1887 | 1888 | 1889 | 1890 | 1891 | 1892 | 1893 | 1894 | 1895 | 1896 | 1897 | 1898 | 1899 | 1900 | 1901 | 1902 | 1903 | 1904 | 1905 | 1906 | 1907 | 1908 | 1909 | 1910 | 1911 | 1912 | 1913 | 1914 | 1915 | 1916 | 1917 | 1918 |  |
|------------------------------------|-----|-----|-----|-----|-----|-----|-----|-----|-----|-----|-----|-----|-----|-----|-----|-----|-----|-----|-----|-----|-----|-----|-----|-----|-----|-----|-----|-----|-----|-----|-----|-----|-----|-----|-----|-----|-----|-----|-----|-----|-----|-----|-----|-----|-----|-----|-----|-----|-----|-----|-----|-----|-----|-----|-----|-----|-----|-----|-----|-----|-----|-----|-----|-----|-----|-----|-----|-----|-----|-----|-----|-----|-----|-----|-----|-----|-----|-----|-----|-----|-----|-----|-----|-----|-----|-----|-----|-----|-----|-----|-----|-----|-----|-----|-----|-----|-----|-----|-----|-----|-----|-----|-----|-----|-----|-----|-----|-----|-----|-----|-----|-----|-----|-----|-----|-----|-----|-----|-----|-----|-----|-----|-----|-----|-----|-----|-----|-----|-----|-----|-----|-----|-----|-----|-----|-----|-----|-----|-----|-----|-----|-----|-----|-----|-----|-----|-----|-----|-----|-----|-----|-----|-----|-----|-----|-----|-----|-----|-----|-----|-----|-----|-----|-----|-----|-----|-----|-----|-----|-----|-----|-----|-----|-----|-----|-----|-----|-----|-----|-----|-----|-----|-----|-----|-----|-----|-----|-----|-----|-----|-----|-----|-----|-----|-----|-----|-----|-----|-----|-----|-----|-----|-----|-----|-----|-----|-----|-----|-----|-----|-----|-----|-----|-----|-----|-----|-----|-----|-----|-----|-----|-----|-----|-----|-----|-----|-----|-----|-----|-----|-----|-----|-----|-----|-----|-----|-----|-----|-----|-----|-----|-----|-----|-----|-----|-----|-----|-----|-----|-----|-----|-----|-----|-----|-----|-----|-----|-----|-----|-----|-----|-----|-----|-----|-----|-----|-----|-----|-----|-----|-----|-----|-----|-----|-----|-----|-----|-----|-----|-----|-----|-----|-----|-----|-----|-----|-----|-----|-----|-----|-----|-----|-----|-----|-----|-----|-----|-----|-----|-----|-----|-----|-----|-----|-----|-----|-----|-----|-----|-----|-----|-----|-----|-----|-----|-----|-----|-----|-----|-----|-----|-----|-----|-----|-----|-----|-----|-----|-----|-----|-----|-----|-----|-----|-----|-----|-----|-----|-----|-----|-----|-----|-----|-----|-----|-----|-----|-----|-----|-----|-----|-----|-----|-----|-----|-----|-----|-----|-----|-----|-----|-----|-----|-----|-----|-----|-----|-----|-----|-----|-----|-----|-----|-----|-----|-----|-----|-----|-----|-----|-----|-----|-----|-----|-----|-----|-----|-----|-----|-----|-----|-----|-----|-----|-----|-----|-----|-----|-----|-----|-----|-----|-----|-----|-----|-----|-----|-----|-----|-----|-----|-----|-----|-----|-----|-----|-----|-----|-----|-----|-----|-----|-----|-----|-----|-----|-----|-----|-----|-----|-----|-----|-----|-----|-----|-----|-----|-----|-----|-----|-----|-----|-----|-----|-----|-----|-----|-----|-----|-----|-----|-----|-----|-----|-----|-----|-----|-----|-----|-----|-----|-----|-----|-----|-----|-----|-----|-----|-----|-----|-----|-----|-----|-----|-----|-----|-----|-----|-----|-----|-----|-----|-----|-----|-----|-----|-----|-----|-----|-----|-----|-----|------|------|------|------|------|------|------|------|------|------|------|------|------|------|------|------|------|------|------|------|------|------|------|------|------|------|------|------|------|------|------|------|------|------|------|------|------|------|------|------|------|------|------|------|------|------|------|------|------|------|------|------|------|------|------|------|------|------|------|------|------|------|------|------|------|------|------|------|------|------|------|------|------|------|------|------|------|------|------|------|------|------|------|------|------|------|------|------|------|------|------|------|------|------|------|------|------|------|------|------|------|------|------|------|------|------|------|------|------|------|------|------|------|------|------|------|------|------|------|------|------|------|------|------|------|------|------|------|------|------|------|------|------|------|------|------|------|------|------|------|------|------|------|------|------|------|------|------|------|------|------|------|------|------|------|------|------|------|------|------|------|------|------|------|------|------|------|------|------|------|------|------|------|------|------|------|------|------|------|------|------|------|------|------|------|------|------|------|------|------|------|------|------|------|------|------|------|------|------|------|------|------|------|------|------|------|------|------|------|------|------|------|------|------|------|------|------|------|------|------|------|------|------|------|------|------|------|------|------|------|------|------|------|------|------|------|------|------|------|------|------|------|------|------|------|------|------|------|------|------|------|------|------|------|------|------|------|------|------|------|------|------|------|------|------|------|------|------|------|------|------|------|------|------|------|------|------|------|------|------|------|------|------|------|------|------|------|------|------|------|------|------|------|------|------|------|------|------|------|------|------|------|------|------|------|------|------|------|------|------|------|------|------|------|------|------|------|------|------|------|------|------|------|------|------|------|------|------|------|------|------|------|------|------|------|------|------|------|------|------|------|------|------|------|------|------|------|------|------|------|------|------|------|------|------|------|------|------|------|------|------|------|------|------|------|------|------|------|------|------|------|------|------|------|------|------|------|------|------|------|------|------|------|------|------|------|------|------|------|------|------|------|------|------|------|------|------|------|------|------|------|------|------|------|------|------|------|------|------|------|------|------|------|------|------|------|------|------|------|------|------|------|------|------|------|------|------|------|------|------|------|------|------|------|------|------|------|------|------|------|------|------|------|------|------|------|------|------|------|------|------|------|------|------|------|------|------|------|------|------|------|------|------|------|------|------|------|------|------|------|------|------|------|------|------|------|------|------|------|------|------|------|------|------|------|------|------|------|------|------|------|------|------|------|------|------|------|------|------|------|------|------|------|------|------|------|------|------|------|------|------|------|------|------|------|------|------|------|------|------|------|------|------|------|------|------|------|------|------|------|------|------|------|------|------|------|------|------|------|------|------|------|------|------|------|------|------|------|------|------|------|------|------|------|------|------|------|------|------|------|------|------|------|------|------|------|------|------|------|------|------|------|------|------|------|------|------|------|------|------|------|------|------|------|------|------|------|------|------|------|------|------|------|------|------|------|------|------|------|------|------|------|------|------|------|------|------|------|------|------|------|------|------|------|------|------|------|------|------|------|------|------|------|------|------|------|------|------|------|------|------|------|------|------|------|------|------|------|------|------|------|------|------|------|------|------|------|------|------|------|------|------|------|------|------|------|------|------|------|------|------|------|------|------|------|------|------|------|------|------|------|------|------|------|------|------|------|------|------|------|------|------|------|------|------|------|------|------|------|------|------|------|------|------|------|------|------|------|------|------|------|------|------|------|------|------|------|------|------|------|------|------|------|------|------|------|------|------|------|------|------|------|------|------|------|------|------|------|------|------|------|------|------|------|------|------|------|------|------|------|------|------|------|------|------|------|------|------|------|------|------|------|------|------|------|------|------|------|------|------|------|------|------|------|------|------|------|------|------|------|------|------|------|------|------|------|------|------|------|------|------|------|------|------|------|------|------|------|------|------|------|------|------|------|------|------|------|------|------|------|------|------|------|------|------|------|------|------|------|------|------|------|------|------|------|------|------|------|------|------|------|------|------|------|------|------|------|------|------|------|------|------|------|------|------|------|------|------|------|------|------|------|------|------|------|------|------|------|------|------|------|------|------|------|------|------|------|------|------|------|------|------|------|------|------|------|------|------|------|------|------|------|------|------|------|------|------|------|------|------|------|------|------|------|------|------|------|------|------|------|------|------|------|------|------|------|------|------|------|------|------|------|------|------|------|------|------|------|------|------|------|------|------|------|------|------|------|------|------|--|
|------------------------------------|-----|-----|-----|-----|-----|-----|-----|-----|-----|-----|-----|-----|-----|-----|-----|-----|-----|-----|-----|-----|-----|-----|-----|-----|-----|-----|-----|-----|-----|-----|-----|-----|-----|-----|-----|-----|-----|-----|-----|-----|-----|-----|-----|-----|-----|-----|-----|-----|-----|-----|-----|-----|-----|-----|-----|-----|-----|-----|-----|-----|-----|-----|-----|-----|-----|-----|-----|-----|-----|-----|-----|-----|-----|-----|-----|-----|-----|-----|-----|-----|-----|-----|-----|-----|-----|-----|-----|-----|-----|-----|-----|-----|-----|-----|-----|-----|-----|-----|-----|-----|-----|-----|-----|-----|-----|-----|-----|-----|-----|-----|-----|-----|-----|-----|-----|-----|-----|-----|-----|-----|-----|-----|-----|-----|-----|-----|-----|-----|-----|-----|-----|-----|-----|-----|-----|-----|-----|-----|-----|-----|-----|-----|-----|-----|-----|-----|-----|-----|-----|-----|-----|-----|-----|-----|-----|-----|-----|-----|-----|-----|-----|-----|-----|-----|-----|-----|-----|-----|-----|-----|-----|-----|-----|-----|-----|-----|-----|-----|-----|-----|-----|-----|-----|-----|-----|-----|-----|-----|-----|-----|-----|-----|-----|-----|-----|-----|-----|-----|-----|-----|-----|-----|-----|-----|-----|-----|-----|-----|-----|-----|-----|-----|-----|-----|-----|-----|-----|-----|-----|-----|-----|-----|-----|-----|-----|-----|-----|-----|-----|-----|-----|-----|-----|-----|-----|-----|-----|-----|-----|-----|-----|-----|-----|-----|-----|-----|-----|-----|-----|-----|-----|-----|-----|-----|-----|-----|-----|-----|-----|-----|-----|-----|-----|-----|-----|-----|-----|-----|-----|-----|-----|-----|-----|-----|-----|-----|-----|-----|-----|-----|-----|-----|-----|-----|-----|-----|-----|-----|-----|-----|-----|-----|-----|-----|-----|-----|-----|-----|-----|-----|-----|-----|-----|-----|-----|-----|-----|-----|-----|-----|-----|-----|-----|-----|-----|-----|-----|-----|-----|-----|-----|-----|-----|-----|-----|-----|-----|-----|-----|-----|-----|-----|-----|-----|-----|-----|-----|-----|-----|-----|-----|-----|-----|-----|-----|-----|-----|-----|-----|-----|-----|-----|-----|-----|-----|-----|-----|-----|-----|-----|-----|-----|-----|-----|-----|-----|-----|-----|-----|-----|-----|-----|-----|-----|-----|-----|-----|-----|-----|-----|-----|-----|-----|-----|-----|-----|-----|-----|-----|-----|-----|-----|-----|-----|-----|-----|-----|-----|-----|-----|-----|-----|-----|-----|-----|-----|-----|-----|-----|-----|-----|-----|-----|-----|-----|-----|-----|-----|-----|-----|-----|-----|-----|-----|-----|-----|-----|-----|-----|-----|-----|-----|-----|-----|-----|-----|-----|-----|-----|-----|-----|-----|-----|-----|-----|-----|-----|-----|-----|-----|-----|-----|-----|-----|-----|-----|-----|-----|-----|-----|-----|-----|-----|-----|-----|-----|-----|-----|-----|-----|-----|-----|-----|-----|-----|-----|-----|-----|-----|-----|-----|-----|-----|-----|-----|-----|-----|-----|-----|-----|-----|-----|------|------|------|------|------|------|------|------|------|------|------|------|------|------|------|------|------|------|------|------|------|------|------|------|------|------|------|------|------|------|------|------|------|------|------|------|------|------|------|------|------|------|------|------|------|------|------|------|------|------|------|------|------|------|------|------|------|------|------|------|------|------|------|------|------|------|------|------|------|------|------|------|------|------|------|------|------|------|------|------|------|------|------|------|------|------|------|------|------|------|------|------|------|------|------|------|------|------|------|------|------|------|------|------|------|------|------|------|------|------|------|------|------|------|------|------|------|------|------|------|------|------|------|------|------|------|------|------|------|------|------|------|------|------|------|------|------|------|------|------|------|------|------|------|------|------|------|------|------|------|------|------|------|------|------|------|------|------|------|------|------|------|------|------|------|------|------|------|------|------|------|------|------|------|------|------|------|------|------|------|------|------|------|------|------|------|------|------|------|------|------|------|------|------|------|------|------|------|------|------|------|------|------|------|------|------|------|------|------|------|------|------|------|------|------|------|------|------|------|------|------|------|------|------|------|------|------|------|------|------|------|------|------|------|------|------|------|------|------|------|------|------|------|------|------|------|------|------|------|------|------|------|------|------|------|------|------|------|------|------|------|------|------|------|------|------|------|------|------|------|------|------|------|------|------|------|------|------|------|------|------|------|------|------|------|------|------|------|------|------|------|------|------|------|------|------|------|------|------|------|------|------|------|------|------|------|------|------|------|------|------|------|------|------|------|------|------|------|------|------|------|------|------|------|------|------|------|------|------|------|------|------|------|------|------|------|------|------|------|------|------|------|------|------|------|------|------|------|------|------|------|------|------|------|------|------|------|------|------|------|------|------|------|------|------|------|------|------|------|------|------|------|------|------|------|------|------|------|------|------|------|------|------|------|------|------|------|------|------|------|------|------|------|------|------|------|------|------|------|------|------|------|------|------|------|------|------|------|------|------|------|------|------|------|------|------|------|------|------|------|------|------|------|------|------|------|------|------|------|------|------|------|------|------|------|------|------|------|------|------|------|------|------|------|------|------|------|------|------|------|------|------|------|------|------|------|------|------|------|------|------|------|------|------|------|------|------|------|------|------|------|------|------|------|------|------|------|------|------|------|------|------|------|------|------|------|------|------|------|------|------|------|------|------|------|------|------|------|------|------|------|------|------|------|------|------|------|------|------|------|------|------|------|------|------|------|------|------|------|------|------|------|------|------|------|------|------|------|------|------|------|------|------|------|------|------|------|------|------|------|------|------|------|------|------|------|------|------|------|------|------|------|------|------|------|------|------|------|------|------|------|------|------|------|------|------|------|------|------|------|------|------|------|------|------|------|------|------|------|------|------|------|------|------|------|------|------|------|------|------|------|------|------|------|------|------|------|------|------|------|------|------|------|------|------|------|------|------|------|------|------|------|------|------|------|------|------|------|------|------|------|------|------|------|------|------|------|------|------|------|------|------|------|------|------|------|------|------|------|------|------|------|------|------|------|------|------|------|------|------|------|------|------|------|------|------|------|------|------|------|------|------|------|------|------|------|------|------|------|------|------|------|------|------|------|------|------|------|------|------|------|------|------|------|------|------|------|------|------|------|------|------|------|------|------|------|------|------|------|------|------|------|------|------|------|------|------|------|------|------|------|------|------|------|------|------|------|------|------|------|------|------|------|------|------|------|------|------|------|------|------|------|------|------|------|------|------|------|------|------|------|------|------|------|------|------|------|------|------|------|------|------|------|------|------|------|------|------|------|------|------|------|------|------|------|------|------|------|------|------|------|------|------|------|------|------|------|------|------|------|------|------|------|------|------|------|------|------|------|------|------|------|------|------|------|------|------|------|------|------|------|------|------|------|------|------|------|------|------|------|------|------|------|------|------|------|------|------|------|------|------|------|------|------|------|------|------|------|------|------|------|------|------|------|------|------|------|------|------|------|------|------|------|------|------|------|------|------|------|------|------|------|------|------|------|------|------|------|------|------|------|------|------|------|------|------|------|------|------|------|------|------|------|------|------|------|------|------|------|------|------|------|------|------|------|------|------|------|------|------|------|------|------|------|------|------|------|------|------|------|------|------|------|------|------|------|------|------|------|------|------|------|------|------|------|------|------|------|------|--|

**Table S5. Categories of nucleotide substitutions in the whole genome (annotated isolates)**

Only sites where two or more isolates have an SNV are considered

|               |       | 1.pos | 2.pos  | 3.pos  | TotalNo |        | 1.pos<br>% | 2.pos<br>% | 3.pos<br>% | Total<br>% | silent |        |
|---------------|-------|-------|--------|--------|---------|--------|------------|------------|------------|------------|--------|--------|
| Transitions   | A-G   | A→G   | 5/10   | 6/12   | 6/20    | 17/42  | 30/71      | 3.47%      | 4.17%      | 6.94%      | 14.58% | 6/20   |
|               |       | G→A   | 4/14   | 6/9    | 3/6     | 13/29  |            | 4.86%      | 3.12%      | 2.08%      | 10.07% | 3/6    |
|               | C-T   | C→T   | 6/19   | 8/24   | 7/35    | 21/78  | 45/15<br>6 | 6.60%      | 8.33%      | 12.15%     | 27.08% | 9/46   |
|               |       | T→C   | 2/9    | 14/39  | 8/30    | 24/78  |            | 3.12%      | 13.54%     | 10.42%     | 27.08% | 8/30   |
|               | Total |       | 17/52  | 34/84  | 24/91   | 75/227 |            | 18.06%     | 29.17%     | 31.60%     | 78.82% | 26/102 |
| Transversions | A-C   | A→C   | 0      | 1 / 2  | 1 / 2   | 2/4    | 2/4        | 0          | 0.69%      | 0.69%      | 1.39%  | 1/2    |
|               |       | C→A   | 0      | 0      | 0       | 0      |            | 0          | 0          | 0          | 0      | 0      |
|               | A-T   | A→T   | 3/6    | 0      | 0       | 3/6    | 7/14       | 2.08%      | 0          | 0          | 2.08%  | 0      |
|               |       | T→A   | 0      | 0      | 4/8     | 4/8    |            | 0          | 0          | 2.78%      | 2.78%  | 4/8    |
|               | G-C   | G→C   | 0      | 0      | 0       | 0      | 0          | 0          | 0          | 0          | 0      | 0      |
|               |       | C→G   | 0      | 0      | 0       | 0      |            | 0          | 0          | 0          | 0      | 0      |
|               | G-T   | G→T   | 2/4    | 0      | 1/2     | 3/6    | 7/43       | 1.39%      | 0          | 0.69%      | 2.08%  | 0      |
|               |       | T→G   | 3/14   | 1/23   | 0       | 4/37   |            | 4.86%      | 7.99%      | 0          | 12.85% | 0      |
|               | Total |       | 8/24   | 2/25   | 6/12    | 16/61  |            | 8.33%      | 8.68%      | 4.17%      | 21.18% | 5/10   |
| Total         |       | 25/76 | 36/109 | 30/103 | 91/288  |        | 26.39%     | 37.85%     | 35.77%     | 100%       | 31/112 |        |
